# Supplementary material for: Towards high-quality, useful practice guidelines for child and youth mental health disorders: protocol for a systematic review and consensus exercise
Source: PubMed Central journal article supplement — BMJ Open. 2018 Feb 6;8(2):e018053. doi: 10.1136/bmjopen-2017-018053 (PMC5829788; doi:10.1136/bmjopen-2017-018053), 2018-02-06
Supplement: bmjopen-2017-018053.draft_revisions.pdf [file bmjopen-2017-018053.draft_revisions.pdf]

# BMJ Open

BMJ Open is committed to open peer review. As part of this commitment we make the peer review history of every article we publish publicly available.

When an article is published we post the peer reviewers' comments and the authors' responses online. We also post the versions of the paper that were used during peer review. These are the versions that the peer review comments apply to.

The versions of the paper that follow are the versions that were submitted during the peer review process. They are not the versions of record or the final published versions. They should not be cited or distributed as the published version of this manuscript.

BMJ Open is an open access journal and the full, final, typeset and author-corrected version of record of the manuscript is available on our site with no access controls, subscription charges or pay-per-view fees (<http://bmjopen.bmj.com>).

If you have any questions on BMJ Open's open peer review process please email [editorial.bmjopen@bmj.com](mailto:editorial.bmjopen@bmj.com)

# BMJ Open

## Towards High Quality, Useful Practice Guidelines for Child and Youth Mental Health Disorders: Protocol for a Systematic Review and Consensus Exercise.

|                               |                                                                                                                                                                                                                                                                                                                                                                                                                                                                                                                                                                                                                                                                                                                                                                                                                                                                                                                                                      |
|-------------------------------|------------------------------------------------------------------------------------------------------------------------------------------------------------------------------------------------------------------------------------------------------------------------------------------------------------------------------------------------------------------------------------------------------------------------------------------------------------------------------------------------------------------------------------------------------------------------------------------------------------------------------------------------------------------------------------------------------------------------------------------------------------------------------------------------------------------------------------------------------------------------------------------------------------------------------------------------------|
| Journal:                      | <i>BMJ Open</i>                                                                                                                                                                                                                                                                                                                                                                                                                                                                                                                                                                                                                                                                                                                                                                                                                                                                                                                                      |
| Manuscript ID                 | bmjopen-2017-018053                                                                                                                                                                                                                                                                                                                                                                                                                                                                                                                                                                                                                                                                                                                                                                                                                                                                                                                                  |
| Article Type:                 | Protocol                                                                                                                                                                                                                                                                                                                                                                                                                                                                                                                                                                                                                                                                                                                                                                                                                                                                                                                                             |
| Date Submitted by the Author: | 02-Jun-2017                                                                                                                                                                                                                                                                                                                                                                                                                                                                                                                                                                                                                                                                                                                                                                                                                                                                                                                                          |
| Complete List of Authors:     | Bennett, Kathryn; McMaster University Faculty of Health Sciences, Health Research Methods, Evidence and Impact (formerly Clinical Epidemiology and Biostatistics)<br>Duda, Stephanie ; McMaster University, Health Research Methods, Evidence and Impact (formerly Clinical Epidemiology and Biostatistics)<br>Brouwers, Melissa; McMaster University<br>Szatmari, Peter; Centre for Addiction and Mental Health<br>Newton, Amanda; University of Alberta<br>McLennan, John; University of Ottawa Department of Psychiatry<br>Sundar, Purnima; Ontario Centre of Excellence for Child and Youth Mental Health<br>Cleverley, Kristin; University of Toronto, Faculty of Nursing<br>Charach, Alice; Hospital for Sick Children<br>Henderson, Joanna; Centre for Addiction and Mental Health, ; University of Toronto Faculty of Medicine, Psychiatry<br>Courtney, Darren; Centre for Addiction and Mental Health<br>Rice, Maureen; McMaster University |
| Keywords:                     | clinical practice guidelines, children, adolescents, MENTAL HEALTH                                                                                                                                                                                                                                                                                                                                                                                                                                                                                                                                                                                                                                                                                                                                                                                                                                                                                   |
|                               |                                                                                                                                                                                                                                                                                                                                                                                                                                                                                                                                                                                                                                                                                                                                                                                                                                                                                                                                                      |

SCHOLARONE™  
Manuscripts

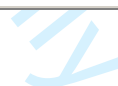

# Towards High Quality, Useful Practice Guidelines for Child and Youth Mental Health Disorders: Protocol for a Systematic Review and Consensus Exercise.

Kathryn Bennett, PhD, Stephanie Duda, MSc, Melissa Brouwers, PhD, Peter Szatmari, MD, FRCPC, Amanda Newton, BScN, PhD, John McLennan, MD, PhD, Purnima Sundar, PhD, Kristin Cleverley, RN, PhD, Alice Charach, MD, Joanna Henderson, PhD, CPsych, Darren Courtney, MD, FRCPC, Maureen Rice, MA, MLIS

Dr. Bennett and Ms. Duda are with the Department of Health Research Methods, Evidence and Impact (formerly the Department of Clinical Epidemiology and Biostatistics), McMaster University, Hamilton, Ontario.

Dr. Brouwers is with the Departments of Oncology and Health Research Methods, Evidence & Impact (formerly the Department of Clinical Epidemiology and Biostatistics), McMaster University, Hamilton, Ontario

Dr. Szatmari is with the Cundill Centre for Child and Youth Depression, the Child and Youth Mental Health Collaborative, Centre for Addiction and Mental Health, the Hospital for Sick Children, and the University of Toronto, Toronto, Ontario.

Dr. Newton is with the Department of Pediatrics, Faculty of Medicine and Dentistry, University of Alberta, Edmonton, Alberta.

Dr. McLennan is with the Children's Hospital of Eastern Ontario Research Institute and the Department of Psychiatry, University of Ottawa, Ottawa, Ontario.

Dr. Sundar is the Director of Knowledge Mobilization at the Ontario Centre of Excellence for Child and Youth Mental Health, Ottawa, Ontario.

Dr. Cleverley is with the Lawrence S. Bloomberg Faculty of Nursing, University of Toronto, and the Margaret and Wallace McCain Centre for Child, Youth & Family Mental Health, Centre for Addiction and Mental Health, Toronto, Ontario.

Dr. Charach is with the Hospital for Sick Children and the Department of Psychiatry, University of Toronto, Toronto, Ontario.

Dr. Henderson is with the Margaret and Wallace McCain Centre for Child, Youth & Family Mental Health, Centre for Addiction and Mental Health, and the Department of Psychiatry, University of Toronto, Toronto, Ontario.

Dr. Courtney is with the Cundill Centre for Child and Youth Depression, Centre for Addiction and Mental Health, and the Department of Psychiatry, University of Toronto, Toronto, Ontario.

Ms Rice is with Searchlight Research Services, Hamilton, Ontario.

1  
2  
3  
4 **Correspondence to:** Kathryn Bennett, PhD, 1280 Main Street West, HSC 3V43D,  
5 Hamilton, Ontario L8S 4K1; Email: [kbennett@mcmaster.ca](mailto:kbennett@mcmaster.ca)  
6

7 **Keywords:** Practice Guidelines; Child; Adolescent; Mental Health  
8

9 **Author Contributions:** KB conceived the initial idea for the study and is the guarantor of the protocol. KB and  
10 SD wrote the first draft of the protocol. KB, SD, MB, PS, AM, JM, PS, KC, AC, JH, CC and MR reviewed multiple  
11 versions of the protocol providing critical comment and further developing the methods. KB, SD, MB, PS, AM, JM,  
12 PS, KC, AC, JH, CC and MR authors read and approved the final version of the manuscript.  
13

14 **Funding Statement:** This work is supported in part by the Margaret and Wallace McCain Centre for Child, Youth  
15 & Family Mental Health, Centre for Addiction and Mental Health, Toronto, Ontario. The funder had no role in the  
16 development or implementation of the protocol.  
17

18 **Competing Interests Statement:** Dr. Courtney reports personal fees from the Cundill Foundation. The  
19 remaining authors report they have nothing to declare.  
20

21 **Data Sharing Statement:** The findings from our systematic review and nominal group consensus exercises will  
22 be disseminated through a specially developed website. Additional information can be requested from the  
23 principal investigator.  
24

25 **Acknowledgements:** We thank the members of our youth and adult family member advisory committee (S  
26 Cannon, Z Johnstone, L Langford, G Loucks, A Messaoudi and H Smith) for their contributions to proposal  
27 methods related to youth and adult family member engagement.  
28  
29  
30  
31  
32  
33  
34  
35  
36  
37  
38  
39  
40  
41  
42  
43  
44  
45  
46  
47  
48  
49  
50  
51  
52  
53  
54  
55  
56  
57  
58  
59  
60

## ABSTRACT

**Introduction:** The quality of clinical practice guidelines (PGs) has not been evaluated in child and youth mental health (CYMH). To address this gap we will: i) conduct a systematic review to answer the question 'among eligible PGs relevant to the prevention or treatment of CYMH conditions, which PGs meet criteria for minimum and high quality?; ii) apply nominal group methods to create recommendations for how CYMH PG quality, completeness and usefulness can be strengthened.

**Methods and Analysis:** Systematic Review: Potentially eligible PGs will be identified in 12 databases using a reproducible search strategy developed by a research librarian. Trained raters will: i) apply pre-specified criteria to identify eligible PGs relevant to depression, anxiety, suicidality, bipolar disorder, behaviour disorder [attention-deficit hyperactivity disorder, oppositional defiant disorder, conduct disorder] and substance use disorder; ii) extract descriptive data; and iii) assess PG quality using the Appraisal of Guidelines for Research and Evaluation (AGREE II) tool. Scores on three AGREE-II domains (rigor of development, stakeholder involvement, editorial independence) will designate PGs as minimum ( $\geq 50\%$ ) or high quality ( $\geq 70\%$ ). Nominal Group: Four CYMH PG knowledge-user groups (clinicians, mental health service planners, youth and adult family members) will participate in structured exercises derived using nominal group methods to generate recommendations to improve PG quality, completeness and usefulness.

**Ethics and Dissemination:** Ethics approval is not required. Study products will be disseminated as follows. A cross-platform website will house eligible CYMH PGs and their quality ratings. Twitter and Facebook tools will promote it to a wide variety of PG users. Data from Google Analytics, Twitonomy, and Altmetrics will inform usage evaluation. Complementary educational workshops will be conducted for CYMH professionals. Print materials and journal articles will be produced.

**Registration Details:** PROSPERO 2017:CRD42017060738

## Strengths and Limitations

- This systematic review will provide currently unavailable information about which existing CYMH PGs are trustworthy, and should be used by clinicians, mental health service planners, youth and family members.
- Our protocol adheres to PRISMA- P criteria.
- Nominal group consensus exercises conducted with four different types of PG users will identify how the quality, completeness and usefulness of CYMH PGs can be strengthened.
- The review cannot address barriers and facilitators of successful guideline implementation.

For peer review only

## INTRODUCTION

Effective interventions are increasingly available to assess, prevent and treat child and youth mental health problems.<sup>1</sup> However, studies repeatedly show that many children and youth experiencing mental health difficulties may not benefit from these interventions. For example, even in resource rich settings only about 20-30% of youth in need are able to obtain any child and youth mental health (CYMH) care.<sup>2</sup> Equally concerning are findings that suggest even when children and youth are able to access CYMH services, the quality of care received is uneven at best, with wide variation in the types of services delivered within a single jurisdiction<sup>3-6</sup> Clinical practice guidelines (PGs) are decision aids that have the potential to help strengthen the quality of CYMH care, and improve CYMH outcomes.<sup>7</sup> The recommendations contained in high quality PGs consist of statements about the comparative benefits and risks of different intervention options, systematically derived using rigorous critical appraisal and research synthesis methodologies. These statements can guide clinical decisions and mental health service planning, reduce variation in the services delivered, and facilitate informed decision-making by youth experiencing mental health difficulties and their family members.<sup>7-9</sup> Numerous CYMH PGs are now available, and leading national and international organizations regularly call for their increased production and use.<sup>10, 11</sup>

The availability of high-quality, 'trustworthy' PGs is a non-negotiable pre-requisite to promoting their development and use.<sup>7</sup> Otherwise, PG implementation may not improve the quality of CYMH care, resulting in little or no mental health benefit to children and youth, and potentially increasing the risk of harm and wasted resources due to the implementation of flawed PG recommendations. PG quality has received considerable attention, particularly in internal medicine and its sub-specialties.<sup>12-14</sup> International criteria have been developed to guide the production of rigorous, clinically trustworthy PGs,<sup>7</sup> and The Appraisal of Guidelines for Research and Evaluation (AGREE II) tool,<sup>15-17</sup> derived from these standards has been used to appraise and improve PG quality relevant to adult chronic disease, and to enable PG users to choose PGs based on quality. More recently the Institute of Medicine (IOM) has proposed eight similar PG quality standards,<sup>18</sup> and work has begun to translate them into a new tool for appraising quality/clinical validity.<sup>19</sup>

In contrast, to date, very little attention has been given to the quality of PGs relevant to CYMH conditions.<sup>20</sup> The need to fill this gap is long overdue. We need to know which available CYMH PGs are trustworthy, and how to design initiatives to strengthen the capacity of the CYMH field to produce high quality, useful PGs. As a first step, we appraised the rigor of the development methods currently used by groups who create CYMH PGs.<sup>20</sup> Five different sets of development methods were identified within 70 individual CYMH PGs. Evaluation of these sets of development methods using both the AGREE II and IOM criteria revealed that roughly 70% of CYMH PGs may not be trustworthy because the methods used to develop them are weak, pointing to the urgent need to evaluate the quality of the actual CYMH PGs. The protocol reported below addresses this need and will proceed in three phases. First, a systematic review will be conducted to answer the question 'Among eligible PGs relevant to the assessment, prevention or treatment of common CYMH conditions, which PGs meet criteria for minimum and high quality?'. The goal is to increase PG user awareness of specific trustworthy CYMH PGs by identifying all available CYMH PGs and determining which ones meet criteria for minimum and high quality standards using the AGREE-II appraisal tool. Second, working with four PG knowledge-user (KU) groups (i.e., clinicians, mental health service planners, youth and adult family members), nominal group methods will be employed to develop recommendations to guide improvements in CYMH PG quality, completeness and usefulness. The goal is to provide consensus-based statements that can inform capacity building initiatives including how to strengthen CYMH PG quality through increased attention to rigorous develop methods, the identification of a core-set of CYMH PGs, how to improve user skills relevant to choosing PGs based on quality, how to increase the alignment of PG content with different KU group needs, and how to co-ordinate the work of different PG development

1 groups so that PG quality is strengthened through increased efficiency and collaboration. Finally, a set of  
2 dissemination activities will be undertaken to make the results of this work widely available to both PG users and  
3 developers.  
4  
5

## 6 **METHODS AND ANALYSIS**

### 7 **Systematic Review (SR) Methods**

8  
9  
10  
11 Our methods adhere to Cochrane Collaboration<sup>21</sup> and PRISMA standards [Preferred Reporting Items for  
12 Systematic Reviews/Meta-analyses and Protocols].<sup>22, 23</sup>  
13

14 **Eligibility Criteria:** Documents identified using the search strategy described below will be deemed eligible if  
15 they meet the following criteria: (i) English language; (ii) documents labeled practice guideline, practice parameter,  
16 or consensus or expert committee recommendations, or documents with the explicit objective or methods to  
17 develop original guidance/recommendations; (iii) published, revised, updated or reaffirmed between 2005-2017;  
18 (iv) address the assessment, prevention or treatment of one of the following CYMH disorder groups (as defined  
19 by DSM-5),<sup>24</sup> mood (major depressive disorder, dysthymia, bipolar disorder), anxiety (agoraphobia, generalized  
20 anxiety disorder, social phobia, specific phobia, panic disorder, separation anxiety disorder), self-harm/suicidality,  
21 disruptive behavior (attention deficit hyperactivity disorder, oppositional defiant disorder, conduct disorder) and  
22 substance use disorders; and (v) relevant to children and youth ≤ 18 years of age. Documents meeting the  
23 foregoing inclusion criteria will be excluded if judged to be a narrative or systematic literature review that contains  
24 summary statements regarding clinical implications/recommendations.  
25  
26  
27

28 **Information Sources:** Following advice from an experienced health research librarian (Rice), we will search  
29 Medline, EMBASE, PsycINFO and CINAHL. Our grey literature search will include PG specific sites (i.e., National  
30 Guideline Clearinghouse, Canadian Medical Association Infobase, National Institute for Health and Care  
31 Excellence, Guidelines International Network International Guideline Library, Australia's Clinical Practice  
32 Guidelines Portal and New Zealand Guidelines Group). It will also target mental health-related organizations (e.g.,  
33 American Academy of Child and Adolescent Psychiatry; Canadian Mental Health Association) and include a  
34 broad search using Google. All searches will be supplemented by: screening reference lists of eligible PGs; using  
35 cited reference searching to reference forward eligible PGs; hand-searching key journals; soliciting  
36 recommendations from team members.  
37  
38  
39

40 **Search Strategy:** Our research librarian will use a strategy that combines subject heading and text terms for  
41 mental health AND guidelines AND children/adolescents. The strategy will be developed in Medline and then  
42 translated to terms appropriate to other databases and peer reviewed.<sup>25</sup> The provisional search strategy is  
43 available upon request.  
44

45 **Information Management:** Search results will be stored using bibliographic management software.  
46

47 **Selection Process:** One methodologist with expertise in the identification and quality assessment of PGs will  
48 independently screen the titles and abstracts of all unduplicated identified records using Reference Manager  
49 software. Records that do not meet inclusion criteria will be excluded at this stage. A research assistant will obtain  
50 full-text records for all potentially relevant documents identified during title and abstract screening. Two  
51 methodologists will then apply the inclusion criteria to full-text documents to identify eligible PGs.  
52  
53  
54  
55  
56  
57  
58  
59  
60



**Data Items and Collection Process:** PG Descriptive Data: Trained research staff will extract data from eligible PGs using a standardized form to capture: date produced; author; organization type (government, medical society, special group, other); country of origin; CYMH disorder; use of research evidence (SR, selective literature review, expert opinion consensus, other); interventions included; outcomes (mental health, academic, social, physical, other); conflict of interest management; other. Training will include refinement and item rewording as needed to improve clarity and optimize reviewer agreement.

**PG Quality Assessment Methods, Raters, Training:** PG quality ratings will be conducted using AGREE II.<sup>17</sup> This validated tool is used widely and consists of 23 questions grouped in 6 domains: scope and purpose, stakeholder involvement, rigor of development, clarity of presentation, applicability, editorial independence. Two additional items assess overall quality. Item response options range from 1 to 7. Two reviewers (MSc in research methods) will participate in a three stage training exercise: completion of the online AGREE II Overview Tutorial,<sup>26</sup> a detailed review of the AGREE II User's Manual,<sup>17</sup>; and an online practice assessment of an example PG.<sup>27</sup> Reviewers will meet with the principal investigator to review disagreements and 'lessons learned' about AGREE II. Following training, the two reviewers will independently apply AGREE II criteria to eligible PGs using the My AGREE PLUS online platform.<sup>28</sup> Inter-rater differences  $\geq 2$  points on initial item scores will be discussed and revised if appropriate, but consensus will not be required. Final item scores will then be aggregated into 6 domain scores by summing both reviewers' scores for all items within a given domain and standardizing as a percentage of the maximum possible score (ranging from 0-100%) using the formula described in the AGREE II User's Manual.<sup>17</sup>

**PG High and Minimum Quality Rating Criteria:** The AGREE II User's Manual does not provide criteria to designate PGs as high or low quality. Thus, the interpretation of domain scores and overall PG quality assessments are determined by the user. We will use scores on three AGREE II domains - stakeholder involvement, rigor of development (that is, rigorous consideration of the relevant research evidence base), and editorial independence (management of academic and financial conflict of interest) - to classify PGs according to quality. Minimum quality PGs will be defined as those that receive a domain score  $\geq 50\%$  on all three domains. High quality PGs will be defined as those that obtain a domain score  $\geq 70\%$  on all three domains. We selected these three domains because they address the extent to which risk of bias is minimized in the identification and interpretation of the research evidence used to derive the guideline recommendations. The remaining three domains, although important, do not evaluate the clinical validity and trustworthiness of the PG; rather they focus on the problem statement, clarity of presentation and implementability.

**Data Synthesis and Statistical Techniques:** Descriptive statistics (means, proportions) will be used to summarize eligible PG characteristics and quality assessment results. We will calculate the intraclass correlation coefficient (ICC) to assess inter-rater agreement<sup>29</sup> and use Fleiss' categories to classify the level of agreement: poor (0-0.40), fair to good (0.41-0.75), and excellent ( $> 0.75$ ).<sup>30</sup> SPSS, version 23 will be used to perform the statistical analyses.

### *Nominal Group Methods*

The SR findings will inform the development of recommendations to guide future CYMH PG development. Four CYMH PG knowledge-user groups, namely clinicians, mental health service planners, youth and adult family members will participate in a series of structured exercises derived using nominal group methods.<sup>31, 32</sup>

**Recommendation Development Group (RDG) Membership:** Group membership influences the outcomes of consensus exercises. Heterogeneous groups representing the range of relevant perspectives are preferred as they are more likely to produce judgments that reflect a conservative or middle ground.<sup>7, 33</sup> For each PG user group, we will form groups composed of 10 individuals. Clinicians and mental health service planners will be

1 identified through nominations by project team investigators. Youth (aged 8 to 18 years) and adult family  
2 members will be nominated by the members of our youth and adult family member advisory committee (see  
3 section below re committee membership and involvement to date in protocol development). Once the four groups  
4 are assembled, members will be asked if important viewpoints are not represented, and additional members (up  
5 to 3) will be invited to participate as needed.  
6  
7

8 Managing Conflict of Interest: Methods consistent with current international standards will be used.<sup>34</sup> RDG  
9 participants will be asked to disclose financial or intellectual conflicts relevant to CYMH PG development. The  
10 project principal investigator in consultation with other co-investigators as needed will review all disclosed conflicts  
11 and make decisions regarding whether an individual should be recused from all or a portion of the  
12 recommendation development exercise.  
13  
14

15 Generating Recommendations: A structured questionnaire, face-to-face meeting interactions and on-line voting  
16 derived from nominal group methods will be used.  
17

18 Structured Pre-Meeting Questionnaire: RDG members will respond to an electronic questionnaire prior to a face-  
19 to-face meeting. Provisional questions include:  
20

21 1. i) Using AGREE II as a framework and the SR findings, how should minimum quality standards for CYMH PGs  
22 be defined? ii) Based on the results of the SR, what methodologic quality criteria should be the focus of capacity  
23 building initiatives designed to improve PG quality? 2. What CYMH PGs constitute a core set (including a  
24 rationale based on prevalence and burden of illness)? 3. What content and PG development processes are  
25 needed to ensure that PGs are useful to specific types of KUs: i) clinicians (child psychiatrists, family physicians,  
26 pediatricians, nurses, psychologists and social workers); ii) mental health service planners in provincial  
27 government ministries, hospitals and community agencies; iii) children and youth; and iv) adult family members? 4.  
28 How can increased collaboration between PG development groups be encouraged in order to strengthen PG  
29 quality and usefulness, and reduce duplication? Collated questionnaire responses will be circulated to all prior to  
30 the meeting.  
31  
32  
33

34 Face-to-Face Meeting: First, collated SR findings and pre-meeting questionnaire results will be reviewed. Then  
35 each KU group will work to draft recommendations related to each pre-meeting question. Each group will report  
36 their draft recommendations for each question to the full group. The principal investigator will collate draft  
37 recommendations into a final provisional set for review in the final session of the day.  
38  
39

40 Generating Final Recommendations and Quantifying the Level of Consensus: We will finalize the content of the  
41 recommendations drafted in the face-to-face meeting and quantify RDG member agreement (0 to 100%) for each  
42 recommendation as follows. First, forty-eight hours after the face-to-face meeting, RDG members will indicate  
43 their level of agreement with each draft recommendation using a 7-point scale (1 = strongly disagree; 7 = strongly  
44 agree). Ratings will be collected anonymously in an online survey. RDG members will then be provided with a  
45 summary of scores, and participate in a conference call one week later to discuss and revise each  
46 recommendation as necessary. Finally, RDG members will re-rate their agreement with each revised  
47 recommendation in a second anonymous online exercise. Although consensus (i.e., 100% agreement among  
48 RDG members on the rating assigned to a recommendation) may be achieved for a specific recommendation, this  
49 is not our aim. Quantifying the extent of variation in agreement/disagreement with the recommendations produced  
50 is an integral part of accurate communication of RDG views.<sup>7</sup>  
51  
52  
53  
54  
55  
56

## *Youth and Family Member Participation in Protocol Development and Preparation Prior to Project Startup*

Informed by patient and public involvement methodology, we have already convened a youth and adult family member advisory group (4 youth, 2 adult family members) to provide leadership throughout the project.<sup>9</sup> During proposal development, this group first planned the type of involvement they wished to have in the project using the following 'meaningful engagement' continuum: consultation, involvement, partnership and shared leadership.<sup>35, 36</sup> The results of their deliberations are as follows. First they will participate as learners in the SR to understand PGs and quality appraisal methods. Then, with this preparation, their goal in subsequent project stages will be participation/shared leadership (e.g., develop recommendations for how PGs can be more acceptable/useful to youth and adult family members; create dissemination tools tailored to the needs of youth and adult family members). Specific processes and roles are aligned with engagement principles including reciprocal relationships, co-learning, partnerships, transparency, honesty, trust.<sup>35, 36</sup>

### *Training Workshops for Youth and Family Members*

Prior to participating in the SR, structured nominal group exercises, face-to-face meeting and online survey to rate consensus on the recommendations, youth and adult family members will participate in three half-day workshops to learn about PGs and the AGREE II quality assessment process. The goal is to prepare them for participation in the SR and recommendation development. A fourth workshop will be convened prior to the full team meeting to prepare draft recommendations. The goals are twofold: i) to prepare youth and adult family members for their role in generating recommendations relevant to PG acceptability/usefulness; and ii) to enable them to provide input into the full team meeting agenda to ensure a meaningful process that facilitates youth and adult family member engagement in the deliberations and decisions.

### *Integrated Knowledge Translation*

Throughout the project, we will use integrated knowledge translation (iKT) methods to ensure our goals and outputs are relevant to the needs of our four KU user groups.<sup>37</sup> Figure 1 illustrates how the core project team will interact with our full team of researchers and KUs to accomplish our iKT goals in each project stage.

### *Potential Challenges*

**Conflict of Interest:** If not managed appropriately, conflict of interest could introduce bias into our work. We will address this risk as follows. First, AGREE II will be applied by MSc level raters with no potential for intellectual or financial conflict of interest that might systematically bias ratings. Second, conflicts among RDG members will be declared and managed as described above. **Number of PGs:** Our pilot work shows that the number of PGs that meet our eligibility criteria can be rated with AGREE II in the timeline proposed (2 years). **Team Member Engagement:** All team members have reviewed our project activities and timeline and have provided written commitments to participate in project activities as shown in Figure 1. **Youth and Adult Family Member Engagement:** This is an area of demonstrated expertise for one of our team members (PS). She has already convened our youth and adult family member advisory group, and successfully engaged them in planning their involvement in each stage of the project.

## ETHICS AND DISSEMINATION

**Ethics:** Ethics approval for this project is not required.

**Web-based PG Repository Platform to Disseminate Quality Assessed PGs:** A cross-platform (i.e., desktop, tablet, and smartphone accessible) website will be created including content tabs to facilitate navigation, a contact form for users to submit questions and a user experience survey to solicit feedback. Figure 2 presents website design elements.

**Website Promotion:** To disseminate our findings and increase PG user knowledge of trustworthy CYMH PGs, we will launch a social media campaign to engage with the CYMH community using Twitter and Facebook, aiming for 3 posts per week. Posts will include PG content, links to PGs, project updates/summaries and news pieces. KUs will also be invited to promote our website through their Twitter accounts.

**Evaluation:** Data from Google Analytics,<sup>38</sup> Twitonomy<sup>39</sup> and Altmetric<sup>40</sup> inform evaluation of website usage.

**Youth and Adult Family Member Website Workshop:** A half-day workshop will be held to enable youth and family members to review website planning with our web/media expert and integrate youth and family member preferences and needs.

**Webinar:** Representatives of each of the four KU groups will participate in webinar development to ensure it meets their needs, and invite their members to participate in one of the four planned webinar offerings.

**Manuscripts:** At least two peer-reviewed open-access publications will be developed.

**Written Materials:** Tailored project summaries, developed with input from our KU groups will be hosted on our website and shared with our KU partners.

**Workshops:** Workshops and presentations will be held at KU meetings [e.g., PolicyWise for Children and Families event, Canadian Academy of Child and Adolescent Psychiatry (CACAP) conference, Canadian Pediatric Society (CPS) conference, College of Family Physicians of Canada (CFPC) Family Health Forum, Healthy Child Manitoba event, Ontario Centre of Excellence in Child and Youth Mental Health partners (e.g., Parents for Children's Mental Health; The New Mentality), Ontario Ministries [Children and Youth Services (MCYS), Health and Longterm Care (MOHLTC), Education (EDU)].

## CONCLUDING STATEMENT

Children and youth deserve the best possible mental health services. To this end, this synthesis, informed by user needs (clinicians, mental health service planner, youth, adult family members) will: advance knowledge by identifying trustworthy CYMH PGs, and documenting the strengths and weaknesses of existing CYMH PGs; guide future PG development by formulating recommendations for how to improve CYMG PG quality, completeness and usefulness; and facilitate knowledge application by creating user informed dissemination tools to promote the use of high quality PGs.

## REFERENCE LIST

1. Patel V, Flisher AJ, Hetrick S, McGorry P. Mental health of young people: a global public-health challenge. *Lancet* 2007;369(9569):1302-13. <https://www.ncbi.nlm.nih.gov/pubmed/17434406>.
2. Merikangas KR, He JP, Burstein M, et al. Service utilization for lifetime mental disorders in U.S. adolescents: results of the National Comorbidity Survey-Adolescent Supplement (NCS-A). *J Am Acad Child Adolesc Psychiatry* 2011;50(1):32-45. <https://www.ncbi.nlm.nih.gov/pubmed/21156268>.
3. Garland AF, Bickman L, Chorpita BF. Change what? Identifying quality improvement targets by investigating usual mental health care. *Adm Policy Ment Health* 2010;37(1-2):15-26. <https://www.ncbi.nlm.nih.gov/pubmed/20177769>.
4. Weisz JR, Sandler IN, Durlak JA, Anton BS. Promoting and protecting youth mental health through evidence-based prevention and treatment. *Am Psychol* 2005;60(6):628-48. <https://www.ncbi.nlm.nih.gov/pubmed/16173895>.
5. Chagnon F, Pouliot L, Malo C, Gervais MJ, Pigeon ME. Comparison of determinants of research knowledge utilization by practitioners and administrators in the field of child and family social services. *Implement Sci* 2010;5:41. <https://www.ncbi.nlm.nih.gov/pubmed/20525270>.
6. Hoagwood K, Burns BJ, Weisz J. A profitable conjunction: from science to service in children's mental health. In: Burns BJ, Hoagwood K, eds. *Community treatment for youth: Evidence-based interventions for severe emotional and behavioural disorders*. New York, NY: Oxford University Press 2002:327-38.
7. Institute of Medicine (US) Committee on Standards for Developing Trustworthy Clinical Practice Guidelines. *Clinical practice guidelines we can trust*. Washington, DC: National Academies Press (US). 2011. Available from: <https://www.ncbi.nlm.nih.gov/books/NBK209539/>.
8. Vernooij RW, Willson M, Gagliardi AR. Characterizing patient-oriented tools that could be packaged with guidelines to promote self-management and guideline adoption: a meta-review. *Implement Sci* 2016;11:52. <https://www.ncbi.nlm.nih.gov/pubmed/27079375>.
9. Légaré F, Boivin A, van der Weijden T, et al. Patient and public involvement in clinical practice guidelines: a knowledge synthesis of existing programs. *Med Decis Making* 2011;31(6):E45-74. <https://www.ncbi.nlm.nih.gov/pubmed/21959267>.
10. Mental Health Commission of Canada. *Changing directions, changing lives: the mental health strategy for Canada*. Calgary, AB. Author. 2012. Available from: <http://strategy.mentalhealthcommission.ca/pdf/strategy-images-en.pdf>.
11. World Health Organization. *WHO handbook for guideline development*. Geneva: World Health Organization. 2011. Available from: [http://apps.who.int/iris/bitstream/10665/75146/1/9789241548441\\_eng.pdf](http://apps.who.int/iris/bitstream/10665/75146/1/9789241548441_eng.pdf).
12. Shaneyfelt TM, Mayo-Smith MF, Rothwangl J. Are guidelines following guidelines? The methodological quality of clinical practice guidelines in the peer-reviewed medical literature. *JAMA* 1999;281(20):1900-5. <https://www.ncbi.nlm.nih.gov/pubmed/10349893>.
13. Alonso-Coello P, Irfan A, Sola I, et al. The quality of clinical practice guidelines over the last two decades: a systematic review of guideline appraisal studies. *Qual Saf Health Care* 2010;19(6):e58. <https://www.ncbi.nlm.nih.gov/pubmed/21127089>.
14. Kung J, Miller RR, Mackowiak PA. Failure of clinical practice guidelines to meet institute of medicine standards: Two more decades of little, if any, progress. *Arch Intern Med* 2012;172(21):1628-33. <https://www.ncbi.nlm.nih.gov/pubmed/23089902>.



15. Brouwers MC, Kho ME, Browman GP, et al. Development of the AGREE II, part 1: performance, usefulness and areas for improvement. *CMAJ* 2010;182(10):1045-52.  
<https://www.ncbi.nlm.nih.gov/pubmed/20513780>.
16. Brouwers MC, Kho ME, Browman GP, et al. Development of the AGREE II, part 2: assessment of validity of items and tools to support application. *CMAJ* 2010;182(10):E472-E78.  
<http://www.ncbi.nlm.nih.gov/pmc/articles/PMC2900368/>.
17. Agree Next Steps Consortium. AGREE-II user's manual 2010-2014 [updated 2013. Available from: <http://www.agreetrust.org> Accessed 06/03/2014.
18. Ransohoff DF, Pignone M, Sox HC. How to decide whether a clinical practice guideline is trustworthy. *JAMA* 2013;309(2):139-40. <https://www.ncbi.nlm.nih.gov/pubmed/23299601>.
19. Developing and testing the National Guideline Clearinghouse extent adherence to trustworthy standards instrument [oral presentation]. 13th Guidelines International Network (G-I-N) Conference [program], 2016.
20. Bennett K, Gorman DA, Duda S, Brouwers M, Szatmari P. Practitioner Review: On the trustworthiness of clinical practice guidelines - a systematic review of the quality of methods used to develop guidelines in child and youth mental health. *J Child Psychol Psychiatry* 2016;57(6):662-73.  
<https://www.ncbi.nlm.nih.gov/pubmed/26945803>.
21. Higgins JPT, Green Se. Cochrane Handbook for Systematic Reviews of Interventions Version 5.1.0 [updated March 2011]: The Cochrane Collaboration; 2011 [Available from: <http://handbook.cochrane.org/> Accessed 02/06,/2011.
22. Moher D, Liberati A, Tetzlaff J, Altman DG. Preferred Reporting Items for Systematic Reviews and Meta-Analyses: the PRISMA statement. *J Clin Epidemiol*;62(10):1006-12.  
<http://dx.doi.org/10.1016/j.jclinepi.2009.06.005>.
23. Shamseer L, Moher D, Clarke M, et al. Preferred reporting items for systematic review and meta-analysis protocols (PRISMA-P) 2015: elaboration and explanation. *BMJ* 2015;349:g7647.  
<https://www.ncbi.nlm.nih.gov/pubmed/25555855>.
24. American Psychiatric Association. Diagnostic and statistical manual of mental disorders, Fifth Edition. Arlington, VA. 2013. Available from: <https://psicovalero.files.wordpress.com/2014/06/dsm-v-manual-diagnc3b3stico-y-estadc3adstico-de-los-trastornos-mentales.pdf>.
25. CADTH. Peer review checklist for search strategies. Toronto, ON. Canadian Agency for Drugs and Technologies in Health (CADTH). 2016. Available from: <https://www.cadth.ca/resources/finding-evidence/press>.
26. The AGREE Research Trust. AGREE II overview tutorial 2010-2014 [Available from: <http://www.agreetrust.org/resource-centre/agree-ii-training-tools/> Accessed 01/05/2016.
27. The AGREE Research Trust. AGREE II tutorial + practice exercise 2010-2014 [Available from: <http://www.agreetrust.org/resource-centre/agree-ii-training-tools/> Accessed 01/05/2016.
28. The AGREE Research Trust. My AGREE PLUS 2010-2014 [Available from: <http://www.agreetrust.org/login/> Accessed 01/05/2016.
29. Fleiss JL, Cohen J. The equivalence of weighted kappa and the intraclass correlation coefficient as measures of reliability. *Educ Psychol Meas* 1973;33(3):613-19.  
<http://journals.sagepub.com/doi/abs/10.1177/001316447303300309>.
30. Fleiss JL, Cohen J. Statistical methods for rates and proportions. 2nd ed. New York, NY: John Wiley 1981:352.

- 1
- 2
- 3 31. Jones J, Hunter D. Consensus methods for medical and health services research. *BMJ* 1995;311(7001):376-
- 4 80. <https://www.ncbi.nlm.nih.gov/pubmed/7640549>.
- 5
- 6 32. Fink A, Kosecoff J, Chassin M, Brook RH. Consensus methods: characteristics and guidelines for use. *Am J*
- 7 *Public Health* 1984;74(9):979-83. <https://www.ncbi.nlm.nih.gov/pubmed/6380323>.
- 8
- 9 33. Hutchings A, Raine R. A systematic review of factors affecting the judgments produced by formal consensus
- 10 development methods in health care. *J Health Serv Res Policy* 2006;11(3):172-9.
- 11 <https://www.ncbi.nlm.nih.gov/pubmed/16824265>.
- 12
- 13 34. Schünemann HJ, Osborne M, Moss J, et al. An official American Thoracic Society Policy statement: managing
- 14 conflict of interest in professional societies. *Am J Respir Crit Care Med* 2009;180(6):564-80.
- 15 <https://www.ncbi.nlm.nih.gov/pubmed/19734351>.
- 16
- 17 35. Patient Centered Outcomes Research Institute (PCORI). PCORI Engagement Rubric 2014 [Available from:
- 18 <http://www.pcori.org/sites/default/files/Engagement-Rubric.pdf> Accessed 02/02/2016.
- 19
- 20 36. Carman KL, Dardess P, Maurer M, et al. Patient and family engagement: a framework for understanding the
- 21 elements and developing interventions and policies. *Health Aff (Millwood)* 2013;32(2):223-31.
- 22 <https://www.ncbi.nlm.nih.gov/pubmed/23381514>.
- 23
- 24 37. CIHR. Guide to knowledge translation planning at CIHR: integrated and end-of-grant approaches. Ottawa, ON.
- 25 Canadian Institutes for Health Research (CIHR). 2012. Available from: [http://www.cihr-](http://www.cihr-irsc.gc.ca/e/documents/kt_lm_ktplan-en.pdf)
- 26 [irsc.gc.ca/e/documents/kt\\_lm\\_ktplan-en.pdf](http://www.cihr-irsc.gc.ca/e/documents/kt_lm_ktplan-en.pdf).
- 27
- 28 38. Google. Google analytics 2017 [Available from: <http://www.google.com/analytics> Accessed 05/12/2015.
- 29
- 30 39. Diginomy Pty Ltd. Twitonomy 2017 [Available from: <https://www.twitonomy.com/> Accessed 05/12/2015.
- 31
- 32 40. Altmetric. Altmetric 2017 [Available from: <https://www.altmetric.com/> Accessed 05/12/2015.
- 33
- 34
- 35
- 36
- 37
- 38
- 39
- 40
- 41
- 42
- 43
- 44
- 45
- 46
- 47
- 48
- 49
- 50
- 51
- 52
- 53
- 54
- 55
- 56
- 57
- 58
- 59
- 60

**Figure 1: Integrated Knowledge Translation Approach and Timeline**

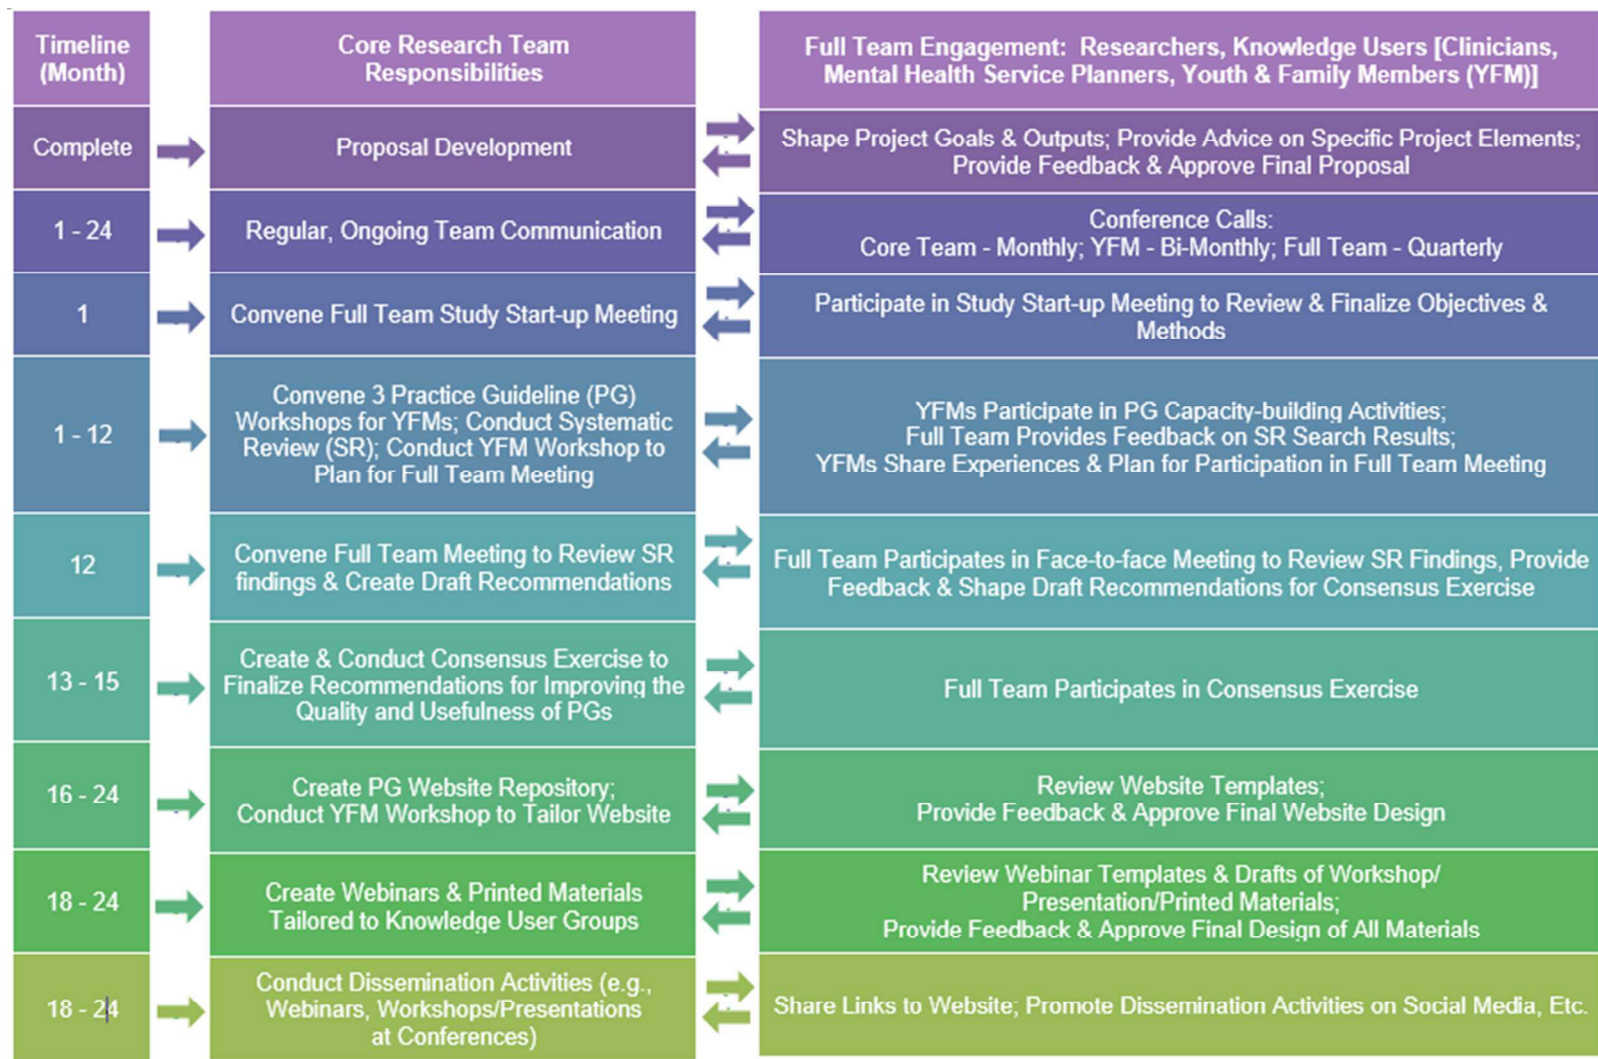



Figure 2: Website Design Elements

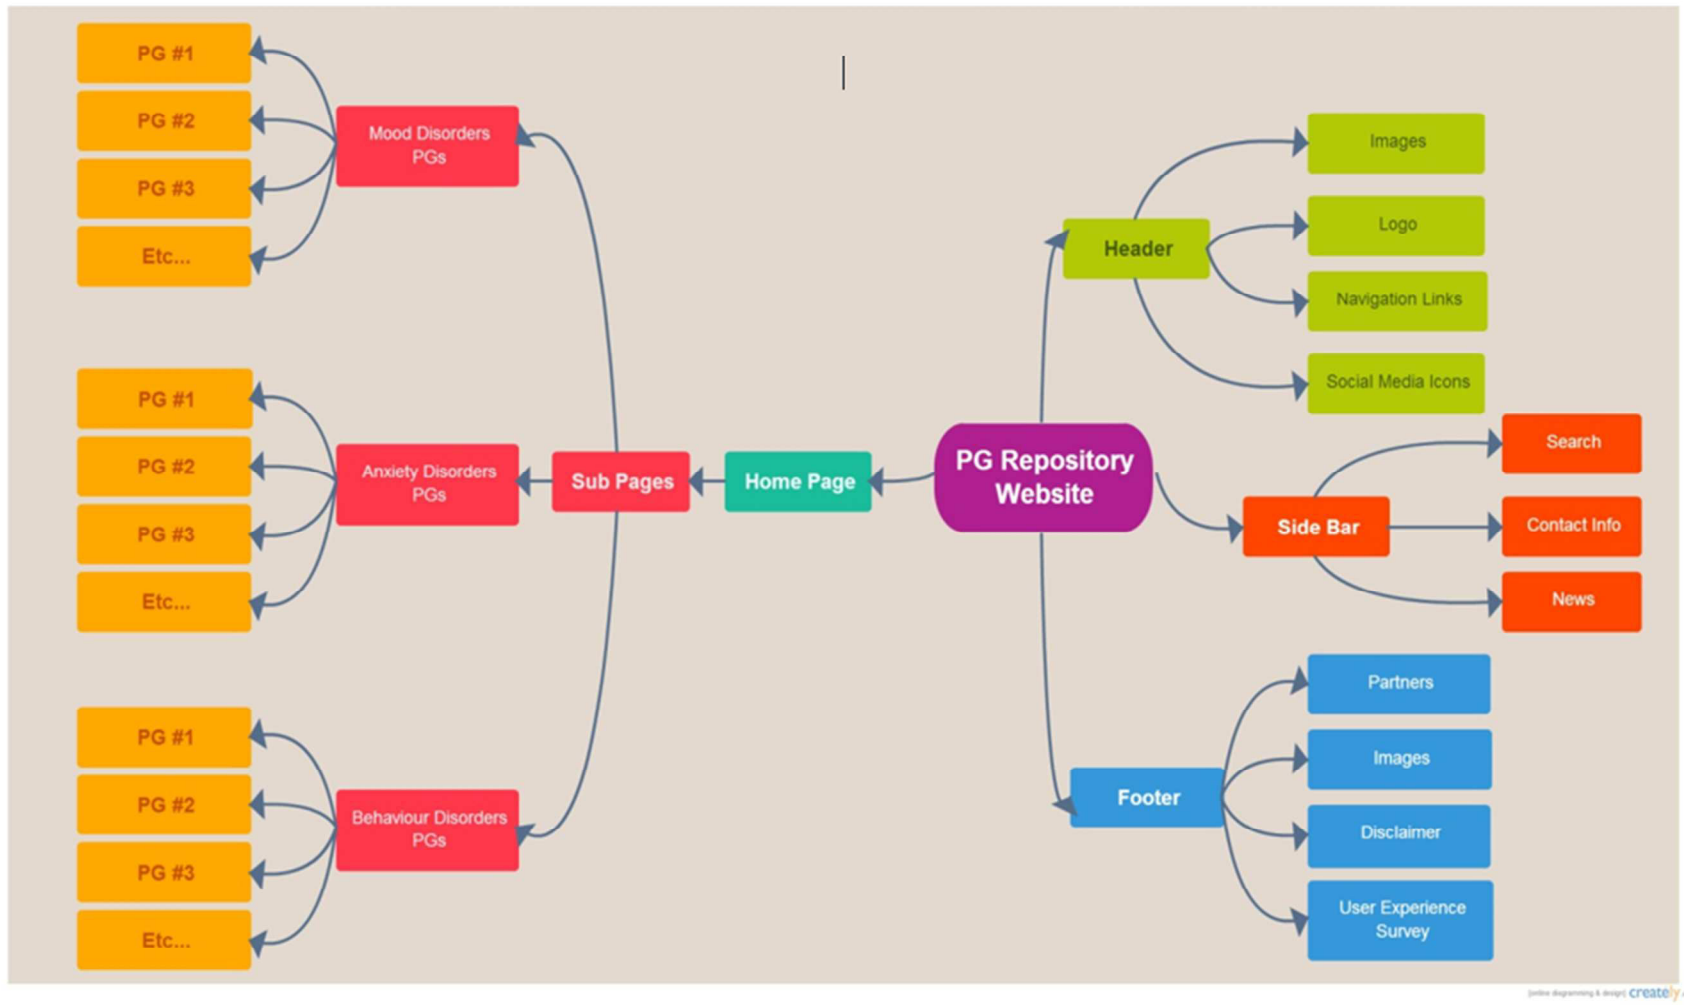

Online Diagramming & Design Createy.com

**PRISMA-P (Preferred Reporting Items for Systematic review and Meta-Analysis Protocols) 2015 checklist: recommended items to address in a systematic review protocol\***

| Section and topic                 | Item No | Page# | Checklist item                                                                                                                                                                                                                |
|-----------------------------------|---------|-------|-------------------------------------------------------------------------------------------------------------------------------------------------------------------------------------------------------------------------------|
| <b>ADMINISTRATIVE INFORMATION</b> |         |       |                                                                                                                                                                                                                               |
| Title:                            |         |       | Towards High Quality, Useful Practice Guidelines for Child and Youth Mental Health Disorders: Protocol for a Systematic Review and Consensus Exercise.                                                                        |
| Identification                    | 1a      | 1     | Identify the report as a protocol of a systematic review                                                                                                                                                                      |
| Update                            | 1b      | N/A   | If the protocol is for an update of a previous systematic review, identify as such                                                                                                                                            |
| Registration                      | 2       | 3     | If registered, provide the name of the registry (such as PROSPERO) and registration number                                                                                                                                    |
| Authors:                          |         |       |                                                                                                                                                                                                                               |
| Contact                           | 3a      | 1     | Provide name, institutional affiliation, e-mail address of all protocol authors; provide physical mailing address of corresponding author                                                                                     |
| Contributions                     | 3b      | 2     | Describe contributions of protocol authors and identify the guarantor of the review                                                                                                                                           |
| Amendments                        | 4       | N/A   | If the protocol represents an amendment of a previously completed or published protocol, identify as such and list changes; otherwise, state plan for documenting important protocol amendments                               |
| Support:                          |         |       |                                                                                                                                                                                                                               |
| Sources                           | 5a      | 2     | Indicate sources of financial or other support for the review                                                                                                                                                                 |
| Sponsor                           | 5b      | N/A   | Provide name for the review funder and/or sponsor                                                                                                                                                                             |
| Role of sponsor or funder         | 5c      | 2     | Describe roles of funder(s), sponsor(s), and/or institution(s), if any, in developing the protocol                                                                                                                            |
| <b>INTRODUCTION</b>               |         |       |                                                                                                                                                                                                                               |
| Rationale                         | 6       | 4     | Describe the rationale for the review in the context of what is already known                                                                                                                                                 |
| Objectives                        | 7       | 4     | Provide an explicit statement of the question(s) the review will address with reference to participants, interventions, comparators, and outcomes (PICO)                                                                      |
| <b>METHODS</b>                    |         |       |                                                                                                                                                                                                                               |
| Eligibility criteria              | 8       | 5     | Specify the study characteristics (such as PICO, study design, setting, time frame) and report characteristics (such as years considered, language, publication status) to be used as criteria for eligibility for the review |
| Information sources               | 9       | 5     | Describe all intended information sources (such as electronic databases, contact with study authors, trial registers or other grey literature sources) with planned dates of coverage                                         |
| Search strategy                   | 10      | 5     | Present draft of search strategy to be used for at least one electronic database, including planned limits, such that it could be repeated                                                                                    |

|                                    |     |     |                                                                                                                                                                                                                                                  |
|------------------------------------|-----|-----|--------------------------------------------------------------------------------------------------------------------------------------------------------------------------------------------------------------------------------------------------|
| Study records:                     |     |     |                                                                                                                                                                                                                                                  |
| Data management                    | 11a | 5   | Describe the mechanism(s) that will be used to manage records and data throughout the review                                                                                                                                                     |
| Selection process                  | 11b | 5   | State the process that will be used for selecting studies (such as two independent reviewers) through each phase of the review (that is, screening, eligibility and inclusion in meta-analysis)                                                  |
| Data collection process            | 11c | 6   | Describe planned method of extracting data from reports (such as piloting forms, done independently, in duplicate), any processes for obtaining and confirming data from investigators                                                           |
| Data items                         | 12  | 6   | List and define all variables for which data will be sought (such as PICO items, funding sources), any pre-planned data assumptions and simplifications                                                                                          |
| Outcomes and prioritization        | 13  | 6   | List and define all outcomes for which data will be sought, including prioritization of main and additional outcomes, with rationale                                                                                                             |
| Risk of bias in individual studies | 14  | 6   | Describe anticipated methods for assessing risk of bias of individual studies, including whether this will be done at the outcome or study level, or both; state how this information will be used in data synthesis                             |
| Data synthesis                     | 15a | 6   | Describe criteria under which study data will be quantitatively synthesised                                                                                                                                                                      |
|                                    | 15b | 6   | If data are appropriate for quantitative synthesis, describe planned summary measures, methods of handling data and methods of combining data from studies, including any planned exploration of consistency (such as $I^2$ , Kendall's $\tau$ ) |
|                                    | 15c | N/A | Describe any proposed additional analyses (such as sensitivity or subgroup analyses, meta-regression)                                                                                                                                            |
|                                    | 15d | N/A | If quantitative synthesis is not appropriate, describe the type of summary planned                                                                                                                                                               |
| Meta-bias(es)                      | 16  | N/A | Specify any planned assessment of meta-bias(es) (such as publication bias across studies, selective reporting within studies)                                                                                                                    |
| Confidence in cumulative evidence  | 17  | N/A | Describe how the strength of the body of evidence will be assessed (such as GRADE)                                                                                                                                                               |

**\* It is strongly recommended that this checklist be read in conjunction with the PRISMA-P Explanation and Elaboration (cite when available) for important clarification on the items. Amendments to a review protocol should be tracked and dated. The copyright for PRISMA-P (including checklist) is held by the PRISMA-P Group and is distributed under a Creative Commons Attribution Licence 4.0.**

*From: Shamseer L, Moher D, Clarke M, Ghersi D, Liberati A, Petticrew M, Shekelle P, Stewart L, PRISMA-P Group. Preferred reporting items for systematic review and meta-analysis protocols (PRISMA-P) 2015: elaboration and explanation. BMJ. 2015 Jan 2;349(jan02 1):g7647.*

# BMJ Open

## Towards High Quality, Useful Practice Guidelines for Child and Youth Mental Health Disorders: Protocol for a Systematic Review and Consensus Exercise.

|                                 |                                                                                                                                                                                                                                                                                                                                                                                                                                                                                                                                                                                                                                                                                                                                                                                                                                                                                                                                                      |
|---------------------------------|------------------------------------------------------------------------------------------------------------------------------------------------------------------------------------------------------------------------------------------------------------------------------------------------------------------------------------------------------------------------------------------------------------------------------------------------------------------------------------------------------------------------------------------------------------------------------------------------------------------------------------------------------------------------------------------------------------------------------------------------------------------------------------------------------------------------------------------------------------------------------------------------------------------------------------------------------|
| Journal:                        | <i>BMJ Open</i>                                                                                                                                                                                                                                                                                                                                                                                                                                                                                                                                                                                                                                                                                                                                                                                                                                                                                                                                      |
| Manuscript ID                   | bmjopen-2017-018053.R1                                                                                                                                                                                                                                                                                                                                                                                                                                                                                                                                                                                                                                                                                                                                                                                                                                                                                                                               |
| Article Type:                   | Protocol                                                                                                                                                                                                                                                                                                                                                                                                                                                                                                                                                                                                                                                                                                                                                                                                                                                                                                                                             |
| Date Submitted by the Author:   | 27-Sep-2017                                                                                                                                                                                                                                                                                                                                                                                                                                                                                                                                                                                                                                                                                                                                                                                                                                                                                                                                          |
| Complete List of Authors:       | Bennett, Kathryn; McMaster University Faculty of Health Sciences, Health Research Methods, Evidence and Impact (formerly Clinical Epidemiology and Biostatistics)<br>Duda, Stephanie ; McMaster University, Health Research Methods, Evidence and Impact (formerly Clinical Epidemiology and Biostatistics)<br>Brouwers, Melissa; McMaster University<br>Szatmari, Peter; Centre for Addiction and Mental Health<br>Newton, Amanda; University of Alberta<br>McLennan, John; University of Ottawa Department of Psychiatry<br>Sundar, Purnima; Ontario Centre of Excellence for Child and Youth Mental Health<br>Cleverley, Kristin; University of Toronto, Faculty of Nursing<br>Charach, Alice; Hospital for Sick Children<br>Henderson, Joanna; Centre for Addiction and Mental Health, ; University of Toronto Faculty of Medicine, Psychiatry<br>Courtney, Darren; Centre for Addiction and Mental Health<br>Rice, Maureen; McMaster University |
| <b>Primary Subject Heading</b>: | Mental health                                                                                                                                                                                                                                                                                                                                                                                                                                                                                                                                                                                                                                                                                                                                                                                                                                                                                                                                        |
| Secondary Subject Heading:      | Evidence based practice                                                                                                                                                                                                                                                                                                                                                                                                                                                                                                                                                                                                                                                                                                                                                                                                                                                                                                                              |
| Keywords:                       | clinical practice guidelines, children, adolescents, MENTAL HEALTH                                                                                                                                                                                                                                                                                                                                                                                                                                                                                                                                                                                                                                                                                                                                                                                                                                                                                   |
|                                 |                                                                                                                                                                                                                                                                                                                                                                                                                                                                                                                                                                                                                                                                                                                                                                                                                                                                                                                                                      |

SCHOLARONE™  
Manuscripts

## Towards High Quality, Useful Practice Guidelines for Child and Youth Mental Health Disorders: Protocol for a Systematic Review and Consensus Exercise.

Kathryn Bennett, PhD, Stephanie Duda, MSc, Melissa Brouwers, PhD, Peter Szatmari, MD, FRCPC, Amanda Newton, BScN, PhD, John McLennan, MD, PhD, Purnima Sundar, PhD, Kristin Cleverley, RN, PhD, Alice Charach, MD, Joanna Henderson, PhD, CPsych, Darren Courtney, MD, FRCPC, Maureen Rice, MA, MLIS

Dr. Bennett and Ms. Duda are with the Department of Health Research Methods, Evidence and Impact (formerly the Department of Clinical Epidemiology and Biostatistics), McMaster University, Hamilton, Ontario.

Dr. Brouwers is with the Departments of Oncology and Health Research Methods, Evidence & Impact (formerly the Department of Clinical Epidemiology and Biostatistics), McMaster University, Hamilton, Ontario

Dr. Szatmari is with the Cundill Centre for Child and Youth Depression, the Child and Youth Mental Health Collaborative, Centre for Addiction and Mental Health, the Hospital for Sick Children, and the University of Toronto, Toronto, Ontario.

Dr. Newton is with the Department of Pediatrics, Faculty of Medicine & Dentistry, University of Alberta, Edmonton, Alberta.

Dr. McLennan is with the Children's Hospital of Eastern Ontario Research Institute and the Department of Psychiatry, University of Ottawa, Ottawa, Ontario and the Department of Pediatrics, University of Calgary, Calgary, Alberta.

Dr. Sundar is the Director of Knowledge Mobilization at the Ontario Centre of Excellence for Child and Youth Mental Health, Ottawa, Ontario.

Dr. Cleverley is with the Lawrence S. Bloomberg Faculty of Nursing, University of Toronto, and the Margaret and Wallace McCain Centre for Child, Youth & Family Mental Health, Centre for Addiction and Mental Health, Toronto, Ontario.

Dr. Charach is with the Hospital for Sick Children and the Department of Psychiatry, University of Toronto, Toronto, Ontario.

Dr. Henderson is with the Margaret and Wallace McCain Centre for Child, Youth & Family Mental Health, Centre for Addiction and Mental Health, and the Department of Psychiatry, University of Toronto, Toronto, Ontario.

Dr. Courtney is with the Cundill Centre for Child and Youth Depression, Centre for Addiction and Mental Health, and the Department of Psychiatry, University of Toronto, Toronto, Ontario.

Ms Rice is with Searchlight Research Services, Hamilton, Ontario.

1  
2  
3  
4  
5  
6 **Correspondence to:** Kathryn Bennett, PhD, 1280 Main Street West, HSC 3V43D,  
7 Hamilton, Ontario L8S 4K1; Email: [kbennett@mcmaster.ca](mailto:kbennett@mcmaster.ca)  
8

9 **Keywords:** Practice Guidelines Child; Adolescent; Mental Health  
10

11 **Author Contributions:** KB conceived the initial idea for the study and is the guarantor of the protocol. KB and  
12 SD wrote the first draft of the protocol. KB, SD, MB, PS, AN, JM, PS, KC, AC, JH, CC, DC and MR reviewed  
13 multiple versions of the protocol providing critical comment and further developing the methods. KB, SD, MB, PS,  
14 AN, JM, PS, KC, AC, JH, CC, DC and MR read and approved the final version of the manuscript.  
15

16 **Funding Statement:** This work is supported in part by the Margaret and Wallace McCain Centre for Child, Youth  
17 & Family Mental Health, Centre for Addiction and Mental Health, Toronto, Ontario. The funder had no role in  
18 developing or implementing the study protocol.  
19

20 **Competing Interests Statement:** All authors report they have nothing to declare.  
21

22 **Data Sharing Statement:** The findings from our systematic review and nominal group consensus exercises will  
23 be disseminated through a specially developed website. Additional information can be requested from the  
24 principal investigator.  
25

26 **Acknowledgements:** We thank the members of our youth and adult family member advisory committee (S  
27 Cannon, Z Johnstone, L Langford, G Loucks, A Messaoudi and H Smith) for their contributions to proposal  
28 methods related to youth and adult family member engagement.  
29  
30  
31  
32  
33  
34  
35  
36  
37  
38  
39  
40  
41  
42  
43  
44  
45  
46  
47  
48  
49  
50  
51  
52  
53  
54  
55  
56  
57  
58  
59  
60

## ABSTRACT

**Introduction:** The quality of clinical practice guidelines (PGs) has not been evaluated in child and youth mental health (CYMH). To address this gap we will: i) conduct a systematic review to answer the question 'among eligible PGs relevant to the prevention or treatment of CYMH conditions, which PGs meet criteria for minimum and high quality?; ii) apply nominal group methods to create recommendations for how CYMH PG quality, completeness and usefulness can be strengthened.

**Methods and Analysis:** Systematic Review: Potentially eligible PGs will be identified in 12 databases using a reproducible search strategy developed by a research librarian. Trained raters will: i) apply pre-specified criteria to identify eligible PGs relevant to depression, anxiety, suicidality, bipolar disorder, behaviour disorder [attention-deficit hyperactivity disorder, oppositional defiant disorder, conduct disorder] and substance use disorder; ii) extract descriptive data; and iii) assess PG quality using the Appraisal of Guidelines for Research and Evaluation (AGREE II) tool. Scores on three AGREE-II domains (rigor of development, stakeholder involvement, editorial independence) will designate PGs as minimum ( $\geq 50\%$ ) or high quality ( $\geq 70\%$ ). Nominal Group: Four CYMH PG knowledge-user groups (clinicians, mental health service planners, youth and adult family members) will participate in structured exercises derived using nominal group methods to generate recommendations to improve PG quality, completeness and usefulness.

**Ethics and Dissemination:** Ethics approval is not required. Study products will be disseminated as follows. A cross-platform website will house eligible CYMH PGs and their quality ratings. Twitter and Facebook tools will promote it to a wide variety of PG users. Data from Google Analytics, Twitonomy, and Altmetrics will inform usage evaluation. Complementary educational workshops will be conducted for CYMH professionals. Print materials and journal articles will be produced.

**Registration Details:** PROSPERO 2017:CRD42017060738

## Strengths and Limitations

- This systematic review will provide currently unavailable information about which existing CYMH PGs are trustworthy, and should be used by clinicians, mental health service planners, youth and family members.
- Our protocol adheres to PRISMA- P criteria.
- Nominal group consensus exercises conducted with four different types of PG users will identify how the quality, completeness and usefulness of CYMH PGs can be strengthened.
- The review cannot address barriers and facilitators of successful guideline implementation.
- Our review is limited to English language guidelines.
- By focusing on diagnosable conditions, it is possible that some important preventive interventions may not be included.



## INTRODUCTION

Effective interventions are increasingly available to assess, prevent and treat child and youth mental health problems.<sup>1</sup> However, studies repeatedly show that many children and youth experiencing mental health difficulties may not benefit from these interventions. For example, even in resource rich settings only about 20-30% of youth in need are able to obtain any child and youth mental health (CYMH) care.<sup>2</sup> Equally concerning are findings that suggest even when children and youth are able to access CYMH services, the quality of care received is uneven at best, with wide variation in the types of services delivered within a single jurisdiction<sup>3-6</sup> Clinical practice guidelines (PGs) are decision aids that have the potential to help strengthen the quality of CYMH care, and improve CYMH outcomes.<sup>7</sup> The recommendations contained in high quality PGs consist of statements about the comparative benefits and risks of different intervention options, systematically derived using rigorous critical appraisal and research synthesis methodologies. These statements can guide clinical decisions and mental health service planning, reduce variation in the services delivered, and facilitate informed decision-making by youth experiencing mental health difficulties and their family members.<sup>7-9</sup> Numerous CYMH PGs are now available, and leading national and international organizations regularly call for their increased production and use.<sup>10, 11</sup>

The availability of high-quality, 'trustworthy' PGs is a non-negotiable pre-requisite to promoting their development and use.<sup>7</sup> Otherwise, PG implementation may not improve the quality of CYMH care, resulting in little or no mental health benefit to children and youth, and potentially increasing the risk of harm and wasted resources due to the implementation of flawed PG recommendations. PG quality has received considerable attention, particularly in internal medicine and its sub-specialties.<sup>12-14</sup> International criteria have been developed to guide the production of rigorous, clinically trustworthy PGs,<sup>7</sup> and The Appraisal of Guidelines for Research and Evaluation (AGREE II) tool,<sup>15-17</sup> derived from these standards has been used to appraise and improve PG quality relevant to adult chronic disease, and to enable PG users to choose PGs based on quality. More recently the Institute of Medicine (IOM) has proposed eight similar PG quality standards,<sup>18</sup> and work has begun to translate them into a new tool for appraising quality/clinical validity.<sup>19</sup>

In contrast, to date, very little attention has been given to the quality of PGs relevant to CYMH conditions.<sup>20</sup> The need to fill this gap is long overdue. We need to know which available CYMH PGs are trustworthy, and how to design initiatives to strengthen the capacity of the CYMH field to produce high quality, useful PGs. As a first step, we appraised the rigor of the development methods currently used by groups who create CYMH PGs.<sup>20</sup> Five different sets of development methods were identified within 70 individual CYMH PGs. Evaluation of these sets of development methods using both the AGREE II and IOM criteria revealed that roughly 70% of CYMH PGs may not be trustworthy because the methods used to develop them are weak, pointing to the urgent need to evaluate the quality of the actual CYMH PGs. The protocol reported below addresses this need and will proceed in three phases. First, a systematic review will be conducted to answer the question 'Among eligible PGs relevant to the assessment, prevention or treatment of common CYMH conditions, which PGs meet criteria for minimum and high quality?'. The goal is to increase PG user awareness of specific trustworthy CYMH PGs by identifying all available CYMH PGs and determining which ones meet criteria for minimum and high quality standards using the

1  
2  
3 AGREE-II appraisal tool. Second, working with four PG knowledge-user (KU) groups (i.e.,  
4 clinicians, mental health service planners, youth and adult family members), nominal group  
5 methods will be employed to develop recommendations to guide improvements in CYMH PG  
6 quality, completeness and usefulness. The goal is to provide consensus-based statements that  
7 can inform capacity building initiatives including how to strengthen CYMH PG quality through  
8 increased attention to rigorous develop methods, the identification of a core-set of CYMH PGs,  
9 how to improve user skills relevant to choosing PGs based on quality, how to increase the  
10 alignment of PG content with different KU group needs, and how to co-ordinate the work of  
11 different PG development groups so that PG quality is strengthened through increased efficiency  
12 and collaboration. Finally, a set of dissemination activities will be undertaken to make the results  
13 of this work widely available to both PG users and developers.  
14  
15  
16

## 17 **METHODS AND ANALYSIS**

### 18 **Systematic Review (SR) Methods**

19  
20  
21  
22 Our methods adhere to Cochrane Collaboration<sup>21</sup> and PRISMA standards [Preferred Reporting  
23 Items for Systematic Reviews/Meta-analyses and Protocols].<sup>22, 23</sup>  
24

25  
26 **Research Question:** Among eligible PGs relevant to the assessment, prevention or treatment of  
27 common CYMH conditions, which PGs meet criteria for minimum and high quality?  
28

29  
30 **Eligibility Criteria:** Documents identified using the search strategy described below will be  
31 deemed eligible if they meet the following criteria: (i) English language; (ii) documents labeled  
32 practice guideline, practice parameter, or consensus or expert committee recommendations, or  
33 documents with the explicit objective or methods to develop original guidance/recommendations;  
34 (iii) published, revised, updated or reaffirmed between 2005-2017; (iv) address the assessment,  
35 prevention or treatment of one of the following CYMH disorder groups (as defined by DSM-5),<sup>24</sup>  
36 mood (major depressive disorder, dysthymia, bipolar disorder), anxiety (agoraphobia, generalized  
37 anxiety disorder, social phobia, specific phobia, panic disorder, separation anxiety disorder), self-  
38 harm/suicidality, disruptive behavior (attention deficit hyperactivity disorder, oppositional defiant  
39 disorder, conduct disorder) and substance use disorders; and (v) relevant to children and youth  $\leq$   
40 18 years of age. Documents meeting the foregoing inclusion criteria will be excluded if judged to  
41 be a narrative or systematic literature review that contains summary statements regarding clinical  
42 implications/recommendations.  
43  
44

45  
46 **Information Sources:** Following advice from an experienced health research librarian (Rice), we  
47 will search Medline, EMBASE, PsycINFO and CINAHL. Our grey literature search will include PG  
48 specific sites (i.e., National Guideline Clearinghouse, Canadian Medical Association Infobase,  
49 National Institute for Health and Care Excellence, Guidelines International Network International  
50 Guideline Library, Australia's Clinical Practice Guidelines Portal and New Zealand Guidelines  
51 Group). It will also target mental health-related organizations (e.g., American Academy of Child  
52 and Adolescent Psychiatry; Canadian Mental Health Association) and include a broad search  
53 using Google. All searches will be supplemented by: screening reference lists of eligible PGs;  
54  
55

1  
2  
3 using cited reference searching to reference forward eligible PGs; hand-searching key journals;  
4 soliciting recommendations from team members.  
5

6 **Search Strategy:** Our research librarian will use a strategy that combines subject heading and  
7 text terms for mental health AND guidelines AND children/adolescents. The strategy will be  
8 developed in Medline and then translated to terms appropriate to other databases and peer  
9 reviewed.<sup>25</sup> A draft search strategy is provided in supplementary file 1.  
10

11 **Information Management:** Search results will be stored using bibliographic management  
12 software.  
13

14 **Selection Process:** One methodologist with expertise in the identification and quality  
15 assessment of PGs will independently screen the titles and abstracts of all unduplicated identified  
16 records using Reference Manager software. Only documents that clearly do not meet our  
17 inclusion criteria will be excluded at this stage, for example, title and/or abstract unambiguously  
18 indicates that the document: i) is specific to adults; ii) does not address one or more of the target  
19 CYMH disorders; or iii) publication date is prior to 2005. All remaining documents will proceed to  
20 full-text screening by two reviewers. A research assistant will obtain full-text records for all  
21 potentially relevant documents identified during title and abstract screening. Then two  
22 methodologists working independently will apply the inclusion criteria to full-text documents to  
23 identify eligible PGs. Disagreements regarding eligibility are then identified and resolved through  
24 discussion with the principal investigator (PI).  
25  
26  
27  
28

29 **Data Items and Collection Process:** A trained research staff member will extract descriptive  
30 data for each eligible PG using a standardized form to capture: date produced; author;  
31 organization type (government, medical society, special group, other); country of origin; CYMH  
32 disorder; target population (children and youth only; children, youth and adults); guideline  
33 purpose (assessment, prevention, treatment). Training will include refinement of item rewording  
34 as needed to improve clarity.  
35  
36

37 **PG Quality Assessment Methods, Raters, Training:** PG quality ratings will be conducted using  
38 AGREE II.<sup>17</sup> This validated tool is used widely and consists of 23 questions grouped in 6 domains:  
39 scope and purpose, stakeholder involvement, rigor of development, clarity of presentation,  
40 applicability, editorial independence. Two additional items assess overall quality. Item response  
41 options range from 1 to 7. Two reviewers (MSc in research methods) will participate in a three stage  
42 training exercise: completion of the online AGREE II Overview Tutorial,<sup>26</sup> a detailed review of the  
43 AGREE II User's Manual,<sup>17</sup>; and an online practice assessment of an example PG.<sup>27</sup> Reviewers will  
44 meet with the principal investigator to review disagreements and 'lessons learned' about AGREE II.  
45 Following training, the two reviewers will independently apply AGREE II criteria to eligible PGs  
46 using the My AGREE PLUS online platform.<sup>28</sup> For each item, reviewers will indicate their score  
47 and justify it by recording document page and paragraph numbers for the information supporting  
48 each item in the comment box. When applying AGREE II criteria, reviewers will ensure that any  
49 companion documents for a given PG (e.g., tools and resources to aid PG implementation,  
50 technical reports, health economic analyses, PG evaluation tools, etc. referenced in the main  
51 document) were considered in addition to the main PG document. Once the two raters have  
52  
53  
54  
55

1  
2  
3 completed their independent AGREE-II ratings, inter-rater differences  $\geq 2$  points on initial item  
4 scores will be identified and discussed by the two raters and the PI. This cut-point has been  
5 chosen as it is both pragmatic and conservative with respect to capturing scoring differences that  
6 arise from misinformation (i.e., guideline documents are often very long and detailed and it is  
7 possible that a reviewer may simply miss important information) rather than differences in  
8 judgment regarding the content of the guideline documentation. Following discussion, reviewers  
9 are asked to reconsider and possibly revise their item scores; however, numerical agreement on  
10 the score assigned for each AGREE II item is not required. Thus, scoring differences that occur  
11 due to missed information in the documentation should be resolved during the discussion of  
12 disagreements. Any differences that remain following discussion should represent between rater  
13 differences in judgment (rather than failure to detect specific pieces of information within PG  
14 documents). Final item scores will then be aggregated into 6 domain scores by summing both  
15 reviewers' scores for all items within a given domain and standardizing as a percentage of the  
16 maximum possible score (ranging from 0-100%) using the formula described in the AGREE II  
17 User's Manual.<sup>17</sup>

18  
19  
20  
21  
22 ***PG High and Minimum Quality Rating Criteria:*** The AGREE II User's Manual does not provide  
23 criteria to designate PGs as high or low quality. Thus, the interpretation of domain scores and  
24 overall PG quality assessments are determined by the user. We will use scores on three AGREE  
25 II domains - stakeholder involvement, rigor of development (that is, rigorous consideration of the  
26 relevant research evidence base), and editorial independence (management of academic and  
27 financial conflict of interest) - to classify PGs according to quality. Minimum quality PGs will be  
28 defined as those that receive a domain score  $\geq 50\%$  on all three domains. High quality PGs will  
29 be defined as those that obtain a domain score  $\geq 70\%$  on all three domains. We selected these  
30 three domains because they address the extent to which risk of bias is minimized in the  
31 identification and interpretation of the research evidence used to derive the guideline  
32 recommendations. The remaining three domains, although important, do not evaluate the clinical  
33 validity and trustworthiness of the PG; rather they focus on the problem statement, clarity of  
34 presentation and implementability.

35  
36  
37  
38 Data Synthesis and Statistical Techniques:

39  
40 PG Characteristics: Descriptive statistics (means, proportions) will be used to summarize eligible  
41 PG characteristics.

42  
43 Rater Agreement for AGREE-II Scores: We will calculate the intraclass correlation coefficient  
44 (ICC) to assess inter-rater agreement<sup>29</sup> and use Fleiss' categories to classify the level of  
45 agreement: poor (0-0.40), fair to good (0.41-0.75), and excellent ( $> 0.75$ ).<sup>30</sup> SPSS, version 23 will  
46 be used to perform the statistical analyses.

47  
48  
49 Guideline Quality: To answer our SR research question, each eligible PG will be classified as  
50 high quality or minimum quality using the AGREE-II methods and classification criteria described  
51 above. The remaining individual domain scores for each PG will be reported for descriptive  
52 purposes. Our narrative summary will address the extent to which guidelines deemed high  
53  
54  
55

1  
2  
3 quality and minimum quality also perform well on the other three domains (i.e., achieve our score  
4 cut-offs for minimum and high quality).  
5

6 The six domain scores and overall guideline quality scores will also be used to describe the  
7 overall quality of CYMH guidelines. More specifically, mean domain scores and mean overall  
8 guideline quality scores for each disorder group will be calculated, and a narrative synthesis of  
9 guideline methodologic strengths and weaknesses will be conducted.  
10

11  
12 The mean domain scores and overall scores for each guideline will also be grouped by source  
13 developer (e.g., government agency, specialty society, independent expert group or other) to  
14 explore descriptively the extent to which each of these groups are more or less likely to produce  
15 high quality guidelines than other groups. Again, narrative synthesis methods will be used to  
16 summarize these findings.  
17

### 18 *Nominal Group Methods*

19  
20  
21 Research Question: How can the quality and usefulness of PGs for CYMH disorders be  
22 strengthened?  
23

24 To develop recommendations to guide future CYMH PG development, we will convene four  
25 CYMH PG knowledge-user groups, namely clinicians, mental health service planners, youth and  
26 adult family members and engage them in a series of structured exercises derived using nominal  
27 group methods and the findings of the SR.<sup>31, 32</sup>  
28

29  
30 Recommendation Development Group (RDG) Membership: Group membership influences the  
31 outcomes of consensus exercises. Heterogeneous groups representing the range of relevant  
32 perspectives are preferred as they are more likely to produce judgments that reflect a  
33 conservative or middle ground.<sup>7, 33</sup> Accordingly, for each PG user group, we will form groups  
34 composed of 10 individuals. Clinicians and mental health service planners will be identified  
35 through nominations by project team investigators. Youth (aged 8 to 18 years) and adult family  
36 members will be nominated by the members of our youth and adult family member advisory  
37 committee (see section below re committee membership and involvement to date in protocol  
38 development). Once the four groups are assembled, members will be asked if important  
39 viewpoints are not represented, and additional members (up to 3) will be invited to participate as  
40 needed.  
41  
42  
43

44 Managing Conflict of Interest: Methods consistent with current international standards will be  
45 used.<sup>34</sup> RDG participants will be asked to disclose financial or intellectual conflicts relevant to  
46 CYMH PG development. The project principal investigator in consultation with other co-  
47 investigators as needed will review all disclosed conflicts and make decisions regarding whether  
48 an individual should be recused from all or a portion of the recommendation development  
49 exercise.  
50

51  
52 Generating Recommendations: A structured questionnaire, face-to-face meeting interactions and  
53 on-line voting derived from nominal group methods will be used.  
54  
55



1  
2  
3 Structured Pre-Meeting Questionnaire: RDG members will respond to an electronic questionnaire  
4 prior to a face-to-face meeting. The content of the questionnaire will be derived from the findings  
5 of the SR and supported by relevant supplemental information. Provisional questions include:  
6

7  
8 1. i) Using AGREE II as a framework and the SR findings, how should minimum quality  
9 standards for CYMH PGs be defined? ii) Based on the results of the SR, what methodologic  
10 quality criteria should be the focus of capacity building initiatives designed to improve PG quality?  
11 2. What CYMH PGs constitute a core set (including a rationale based on prevalence and burden  
12 of illness)? 3. What content and PG development processes are needed to ensure that PGs are  
13 useful to specific types of KUs: i) clinicians (child psychiatrists, family physicians, pediatricians,  
14 nurses, psychologists and social workers); ii) mental health service planners in provincial  
15 government ministries, hospitals and community agencies; iii) children and youth; and iv) adult  
16 family members? 4. How can increased collaboration between PG development groups be  
17 encouraged in order to strengthen PG quality and usefulness, and reduce duplication?  
18  
19

20 Each question will be linked to supplemental material based on SR findings and/or the content of  
21 the minimum and high quality PGs. For example, for question 1 the quality ratings for each PG  
22 (i.e., domain scores) will be presented in tabular form. Each RDG participant will be asked to  
23 indicate whether each domain is relevant to defining minimum quality standards, and if so what  
24 score cut-point should be used? Similarly, participants will be asked to define high quality using  
25 the AGREE-II domains. For provisional question 3 (What content and PG development  
26 processes are needed to ensure that PGs are useful to specific types of PG-users?), each RDG  
27 participant will be provided with electronic access to supplementary materials (e.g., template  
28 summary of PG content, template summary of PG development process, copy of actual PG)  
29 derived from the minimum and high quality PGs, and asked to identify specific aspects of the  
30 content and developmental processes that are essential and/or missing from their user  
31 perspective.  
32  
33  
34

35 Face-to-Face Meeting: First, the SR findings and collated pre-meeting questionnaire results will  
36 be reviewed in a large group session. Then each KU group will work independently in small  
37 groups with an expert facilitator who is not part of the research team to draft recommendations  
38 related to each pre-meeting question. The goal is to ensure that each PG user group has an  
39 equal voice, and that all individuals have the opportunity to express their views. Each small  
40 group will then report their draft recommendations for each question to the full group. The  
41 principal investigator will collate draft recommendations into a final provisional set for review in  
42 the final session of the day. The final set will include draft recommendations that are common to  
43 all four PG user groups and draft recommendations that are unique to a specific PG-user group.  
44  
45  
46

47 Generating Final Recommendations and Quantifying the Level of Consensus: We will finalize the  
48 content of the recommendations drafted in the face-to-face meeting and quantify RDG member  
49 agreement (0 to 100%) for each recommendation as follows. First, forty-eight hours after the  
50 face-to-face meeting, RDG members will indicate their level of agreement with each draft  
51 recommendation using a 7-point scale (1 = strongly disagree; 7 = strongly agree). Ratings will be  
52 collected anonymously in an online survey. RDG members will then be provided with a summary  
53 of scores, and participate in a conference call one week later to discuss and revise each  
54  
55  
56

1  
2  
3 recommendation as necessary. Finally, RDG members will re-rate their agreement with each  
4 revised recommendation in a second anonymous online exercise. Although consensus (i.e.,  
5 100% agreement among RDG members on the rating assigned to a recommendation) may be  
6 achieved for a specific recommendation, this is not our aim. Quantifying the extent of variation in  
7 agreement/disagreement with the recommendations produced is an integral part of accurate  
8 communication of RDG views.<sup>7</sup>  
9

### 10 11 *Youth and Family Member Participation in Protocol Development and Preparation Prior* 12 *to* 13 *Project Startup* 14 15

16 Informed by patient and public involvement methodology, we have already convened a youth and  
17 adult family member advisory group (4 youth, 2 adult family members) to provide leadership  
18 throughout the project.<sup>9</sup> During proposal development, this group first planned the type of  
19 involvement they wished to have in the project using the following 'meaningful engagement'  
20 continuum: consultation, involvement, partnership and shared leadership.<sup>35, 36</sup> The results of their  
21 deliberations are as follows. First they will participate as learners in the SR to understand PGs  
22 and quality appraisal methods. Then, with this preparation, their goal in subsequent project  
23 stages will be participation/shared leadership (e.g., develop recommendations for how PGs can  
24 be more acceptable/useful to youth and adult family members; create dissemination tools tailored  
25 to the needs of youth and adult family members). Specific processes and roles are aligned with  
26 engagement principles including reciprocal relationships, co-learning, partnerships, transparency,  
27 honesty, trust.<sup>35, 36</sup>  
28  
29  
30

### 31 *Training Workshops for Youth and Family Members* 32 33

34 Four training workshops for youth and adult family members will be conducted prior to  
35 participating in the SR, structured nominal group exercises, face-to-face meeting, online survey  
36 and conference call. First, youth and adult family members will participate in three half-day  
37 workshops to learn about PGs and the AGREE II quality assessment process. The goal is to  
38 support capacity development, and facilitate their engagement in the SR and recommendation  
39 development process. The first workshop will include a 1:1 orientation for each individual and a  
40 'Terms of Reference (ToFR) document will be co-developed with the entire group. This document  
41 will capture the core engagement principals that guide our project and the continuum of  
42 meaningful engagement we are utilizing (see preceding section). Workshop one will also address  
43 processes to support conflict resolution and clinical support.  
44  
45

46 A fourth workshop will be convened prior to the full team meeting focusing on recommendation  
47 development to: i) prepare youth and adult family members for their role in generating  
48 recommendations relevant to PG acceptability/usefulness; and ii) enable them to provide input  
49 into the full team meeting agenda to ensure a meaningful process that facilitates youth and adult  
50 family member engagement in the deliberations and decisions.  
51  
52

53 We will also conduct briefing sessions prior to and following each workshop, and provide ongoing  
54 support as appropriate to facilitate sustained engagement.  
55

### *Integrated Knowledge Translation*

Throughout the project, we will use integrated knowledge translation (iKT) methods to ensure our goals and outputs are relevant to the needs of our four KU user groups.<sup>37</sup> Figure 1 illustrates how the core project team will interact with our full team of researchers and KUs to accomplish our iKT goals in each project stage.

### *Potential Challenges*

**Conflict of Interest:** If not managed appropriately, conflict of interest could introduce bias into our work. We will address this risk as follows. First, AGREE II will be applied by MSc level raters with no potential for intellectual or financial conflict of interest that might systematically bias ratings. Second, conflicts among RDG members will be declared and managed as described above.

**Number of PGs:** Our pilot work shows that the number of PGs that meet our eligibility criteria can be rated with AGREE II in the timeline proposed (2 years).

**Team Member Engagement:** All team members have reviewed our project activities and timeline and have provided written commitments to participate in project activities as shown in Figure 1.

**Youth and Adult Family Member Engagement:** This is an area of demonstrated expertise for one of our team members (PS). She has already convened our youth and adult family member advisory group, and successfully engaged them in planning their involvement in each stage of the project.

## **ETHICS AND DISSEMINATION**

**Ethics:** This systematic review and consensus exercise protocol is considered a quality improvement initiative and hence, does not require ethics approval<sup>38</sup>

**Web-based PG Repository Platform to Disseminate Quality Assessed PGs:** A cross-platform (i.e., desktop, tablet, and smartphone accessible) website will be created including content tabs to facilitate navigation, a contact form for users to submit questions and a user experience survey to solicit feedback. Figure 2 presents website design elements.

**Website Promotion:** To disseminate our findings and increase PG user knowledge of trustworthy CYMH PGs, we will launch a social media campaign to engage with the CYMH community using Twitter and Facebook, aiming for 3 posts per week. Posts will include PG content, links to PGs, project updates/summaries and news pieces. KUs will also be invited to promote our website through their Twitter accounts.

**Evaluation:** Data from Google Analytics,<sup>39</sup> Twitonomy<sup>40</sup> and Altmetric<sup>41</sup> inform evaluation of website usage.

**Youth and Adult Family Member Website Workshop:** A half-day workshop will be held to enable youth and family members to review website planning with our web/media expert and integrate youth and family member preferences and needs.



1  
2  
3 **Webinar:** Representatives of each of the four KU groups will participate in webinar development  
4 to ensure it meets their needs, and invite their members to participate in one of the four planned  
5 webinar offerings.  
6

7 **Manuscripts:** At least two peer-reviewed open-access publications will be developed.  
8

9 **Written Materials:** Tailored project summaries, developed with input from our KU groups will be  
10 hosted on our website and shared with our KU partners.  
11

12 **Workshops:** Workshops and presentations will be held at KU meetings [e.g., PolicyWise for  
13 Children and Families event, Canadian Academy of Child and Adolescent Psychiatry (CACAP)  
14 conference, Canadian Pediatric Society (CPS) conference, College of Family Physicians of  
15 Canada (CFPC) Family Health Forum, Healthy Child Manitoba event, Ontario Centre of  
16 Excellence in Child and Youth Mental Health partners (e.g., Parents for Children's Mental Health;  
17 The New Mentality), Ontario Ministries [Children and Youth Services (MCYS), Health and  
18 Longterm Care (MOHLTC), Education (EDU)].  
19  
20  
21  
22

## 23 **CONCLUDING STATEMENT**

24  
25 Children and youth deserve the best possible mental health services. To this end, this synthesis,  
26 informed by user needs (clinicians, mental health service planner, youth, adult family members)  
27 will: advance knowledge by identifying trustworthy CYMH PGs, and documenting the strengths  
28 and weaknesses of existing CYMH PGs; guide future PG development by formulating  
29 recommendations for how to improve CYMG PG quality, completeness and usefulness; and  
30 facilitate knowledge application by creating user informed dissemination tools to promote the use  
31 of high quality PGs.  
32  
33  
34  
35  
36  
37  
38  
39  
40  
41  
42  
43  
44  
45  
46  
47  
48  
49  
50  
51  
52  
53  
54  
55  
56  
57  
58  
59  
60

## REFERENCE LIST

1. Patel V, Flisher AJ, Hetrick S, McGorry P. Mental health of young people: a global public-health challenge. *Lancet* 2007;369(9569):1302-13. <https://www.ncbi.nlm.nih.gov/pubmed/17434406>.
2. Merikangas KR, He JP, Burstein M, et al. Service utilization for lifetime mental disorders in U.S. adolescents: results of the National Comorbidity Survey-Adolescent Supplement (NCS-A). *J Am Acad Child Adolesc Psychiatry* 2011;50(1):32-45. <https://www.ncbi.nlm.nih.gov/pubmed/21156268>.
3. Garland AF, Bickman L, Chorpita BF. Change what? Identifying quality improvement targets by investigating usual mental health care. *Adm Policy Ment Health* 2010;37(1-2):15-26. <https://www.ncbi.nlm.nih.gov/pubmed/20177769>.
4. Weisz JR, Sandler IN, Durlak JA, Anton BS. Promoting and protecting youth mental health through evidence-based prevention and treatment. *Am Psychol* 2005;60(6):628-48. <https://www.ncbi.nlm.nih.gov/pubmed/16173895>.
5. Chagnon F, Pouliot L, Malo C, Gervais MJ, Pigeon ME. Comparison of determinants of research knowledge utilization by practitioners and administrators in the field of child and family social services. *Implement Sci* 2010;5:41. <https://www.ncbi.nlm.nih.gov/pubmed/20525270>.
6. Hoagwood K, Burns BJ, Weisz J. A profitable conjunction: from science to service in children's mental health. In: Burns BJ, Hoagwood K, eds. *Community treatment for youth: Evidence-based interventions for severe emotional and behavioural disorders*. New York, NY: Oxford University Press 2002:327-38.
7. Institute of Medicine (US) Committee on Standards for Developing Trustworthy Clinical Practice Guidelines. *Clinical practice guidelines we can trust*. Washington, DC. National Academies Press (US). 2011. Available from: <https://www.ncbi.nlm.nih.gov/books/NBK209539/>.
8. Vernooij RW, Willson M, Gagliardi AR. Characterizing patient-oriented tools that could be packaged with guidelines to promote self-management and guideline adoption: a meta-review. *Implement Sci* 2016;11:52. <https://www.ncbi.nlm.nih.gov/pubmed/27079375>.
9. Légaré F, Boivin A, van der Weijden T, et al. Patient and public involvement in clinical practice guidelines: a knowledge synthesis of existing programs. *Med Decis Making* 2011;31(6):E45-74. <https://www.ncbi.nlm.nih.gov/pubmed/21959267>.
10. Mental Health Commission of Canada. *Changing directions, changing lives: the mental health strategy for Canada*. Calgary, AB. Author. 2012. Available from: <http://strategy.mentalhealthcommission.ca/pdf/strategy-images-en.pdf>.
11. World Health Organization. *WHO handbook for guideline development*. Geneva. World Health Organization. 2011. Available from: [http://apps.who.int/iris/bitstream/10665/75146/1/9789241548441\\_eng.pdf](http://apps.who.int/iris/bitstream/10665/75146/1/9789241548441_eng.pdf).
12. Shaneyfelt TM, Mayo-Smith MF, Rothwangl J. Are guidelines following guidelines? The methodological quality of clinical practice guidelines in the peer-reviewed medical literature. *JAMA* 1999;281(20):1900-5. <https://www.ncbi.nlm.nih.gov/pubmed/10349893>.

13. Alonso-Coello P, Irfan A, Sola I, et al. The quality of clinical practice guidelines over the last two decades: a systematic review of guideline appraisal studies. *Qual Saf Health Care* 2010;19(6):e58. <https://www.ncbi.nlm.nih.gov/pubmed/21127089>.
14. Kung J, Miller RR, Mackowiak PA. Failure of clinical practice guidelines to meet institute of medicine standards: Two more decades of little, if any, progress. *Arch Intern Med* 2012;172(21):1628-33. <https://www.ncbi.nlm.nih.gov/pubmed/23089902>.
15. Brouwers MC, Kho ME, Browman GP, et al. Development of the AGREE II, part 1: performance, usefulness and areas for improvement. *CMAJ* 2010;182(10):1045-52. <https://www.ncbi.nlm.nih.gov/pubmed/20513780>.
16. Brouwers MC, Kho ME, Browman GP, et al. Development of the AGREE II, part 2: assessment of validity of items and tools to support application. *CMAJ* 2010;182(10):E472-E78. <http://www.ncbi.nlm.nih.gov/pmc/articles/PMC2900368/>.
17. Agree Next Steps Consortium. AGREE-II user's manual 2010-2014 [updated 2013. Available from: <http://www.agreetrust.org> Accessed 06/03/2014.
18. Ransohoff DF, Pignone M, Sox HC. How to decide whether a clinical practice guideline is trustworthy. *JAMA* 2013;309(2):139-40. <https://www.ncbi.nlm.nih.gov/pubmed/23299601>.
19. Developing and testing the National Guideline Clearinghouse extent adherence to trustworthy standards instrument [oral presentation]. 13th Guidelines International Network (G-I-N) Conference [program], 2016.
20. Bennett K, Gorman DA, Duda S, Brouwers M, Szatmari P. Practitioner Review: On the trustworthiness of clinical practice guidelines - a systematic review of the quality of methods used to develop guidelines in child and youth mental health. *J Child Psychol Psychiatry* 2016;57(6):662-73. <https://www.ncbi.nlm.nih.gov/pubmed/26945803>.
21. Higgins JPT, Green Se. Cochrane Handbook for Systematic Reviews of Interventions Version 5.1.0 [updated March 2011]: The Cochrane Collaboration; 2011 [Available from: <http://handbook.cochrane.org/> Accessed 02/06,/2011.
22. Moher D, Liberati A, Tetzlaff J, Altman DG. Preferred Reporting Items for Systematic Reviews and Meta-Analyses: the PRISMA statement. *J Clin Epidemiol*;62(10):1006-12. <http://dx.doi.org/10.1016/j.jclinepi.2009.06.005>.
23. Shamseer L, Moher D, Clarke M, et al. Preferred reporting items for systematic review and meta-analysis protocols (PRISMA-P) 2015: elaboration and explanation. *BMJ* 2015;349:g7647. <https://www.ncbi.nlm.nih.gov/pubmed/25555855>.
24. American Psychiatric Association. Diagnostic and statistical manual of mental disorders, Fifth Edition. Arlington, VA. 2013. Available from: <https://psicovalero.files.wordpress.com/2014/06/dsm-v-manual-diagnc3b3stico-y-estadc3adstico-de-los-trastornos-mentales.pdf>.
25. CADTH. Peer review checklist for search strategies. Toronto, ON. Canadian Agency for Drugs and Technologies in Health (CADTH). 2016. Available from: <https://www.cadth.ca/resources/finding-evidence/press>.
26. The AGREE Research Trust. AGREE II overview tutorial 2010-2014 [Available from: <http://www.agreetrust.org/resource-centre/agree-ii-training-tools/> Accessed 01/05/2016.

- 1  
2  
3 27. The AGREE Research Trust. AGREE II tutorial + practice exercise 2010-2014 [Available  
4 from: <http://www.agreetrust.org/resource-centre/agree-ii-training-tools/> Accessed  
5 01/05/2016.
- 6  
7 28. The AGREE Research Trust. My AGREE PLUS 2010-2014 [Available from:  
8 <http://www.agreetrust.org/login/> Accessed 01/05/2016.
- 9  
10 29. Fleiss JL, Cohen J. The equivalence of weighted kappa and the intraclass correlation  
11 coefficient as measures of reliability. *Educ Psychol Meas* 1973;33(3):613-19.  
12 <http://journals.sagepub.com/doi/abs/10.1177/001316447303300309>.
- 13  
14 30. Fleiss JL, Cohen J. Statistical methods for rates and proportions. 2nd ed. New York, NY: John  
15 Wiley 1981:352.
- 16  
17 31. Jones J, Hunter D. Consensus methods for medical and health services research. *BMJ*  
18 1995;311(7001):376-80. <https://www.ncbi.nlm.nih.gov/pubmed/7640549>.
- 19  
20 32. Fink A, Kosecoff J, Chassin M, Brook RH. Consensus methods: characteristics and  
21 guidelines for use. *Am J Public Health* 1984;74(9):979-83.  
22 <https://www.ncbi.nlm.nih.gov/pubmed/6380323>.
- 23  
24 33. Hutchings A, Raine R. A systematic review of factors affecting the judgments produced by  
25 formal consensus development methods in health care. *J Health Serv Res Policy*  
26 2006;11(3):172-9. <https://www.ncbi.nlm.nih.gov/pubmed/16824265>.
- 27  
28 34. Schünemann HJ, Osborne M, Moss J, et al. An official American Thoracic Society Policy  
29 statement: managing conflict of interest in professional societies. *Am J Respir Crit Care*  
30 *Med* 2009;180(6):564-80. <https://www.ncbi.nlm.nih.gov/pubmed/19734351>.
- 31  
32 35. Patient Centered Outcomes Research Institute (PCORI). PCORI Engagement Rubric 2014  
33 [Available from: <http://www.pcori.org/sites/default/files/Engagement-Rubric.pdf> Accessed  
34 02/02/2016.
- 35  
36 36. Carman KL, Dardess P, Maurer M, et al. Patient and family engagement: a framework for  
37 understanding the elements and developing interventions and policies. *Health Aff*  
38 *(Millwood)* 2013;32(2):223-31. <https://www.ncbi.nlm.nih.gov/pubmed/23381514>.
- 39  
40 37. CIHR. Guide to knowledge translation planning at CIHR: integrated and end-of-grant  
41 approaches. Ottawa, ON. Canadian Institutes for Health Research (CIHR). 2012.  
42 Available from: [http://www.cihr-irsc.gc.ca/e/documents/kt\\_lm\\_ktplan-en.pdf](http://www.cihr-irsc.gc.ca/e/documents/kt_lm_ktplan-en.pdf).
- 43  
44 38. Canadian Institutes of Health Research, Natural Sciences and Engineering Research Council  
45 of Canada, and Social Sciences and Humanities Research Council of Canada. Tri-  
46 Council Policy Statement. Ethical conduct for research involving humans. 2014. Available  
47 from: [http://www.pre.ethics.gc.ca/pdf/eng/tcps2-2014/TCPS\\_2\\_FINAL\\_Web.pdf](http://www.pre.ethics.gc.ca/pdf/eng/tcps2-2014/TCPS_2_FINAL_Web.pdf).
- 48  
49 39. Google. Google analytics 2017 [Available from: <http://www.google.com/analytics> Accessed  
50 05/12/2015.
- 51  
52 40. Diginomy Pty Ltd. Twitonomy 2017 [Available from: <https://www.twitonomy.com/> Accessed  
53 05/12/2015.
- 54  
55 41. Altmetric. Altmetric 2017 [Available from: <https://www.altmetric.com/> Accessed 05/12/2015.
- 56  
57  
58  
59  
60

1  
2  
3  
4  
5  
6  
7  
8  
9  
10  
11  
12  
13  
14  
15  
16  
17  
18  
19  
20  
21  
22  
23  
24  
25  
26  
27  
28  
29  
30  
31  
32  
33  
34  
35  
36  
37  
38  
39  
40  
41  
42  
43  
44  
45  
46  
47  
48  
49  
50  
51  
52  
53  
54  
55  
56  
57  
58  
59  
60

Figure Legends

Figure 1: Team members will conduct their work over a 24 month period as described in the steps shown.

Figure 2: Our practice guideline respository website will be structured as shown providing access to quality appraised guidelines organized by disorder.

For peer review only

Figure 1: Integrated Knowledge Translation Approach and Timeline

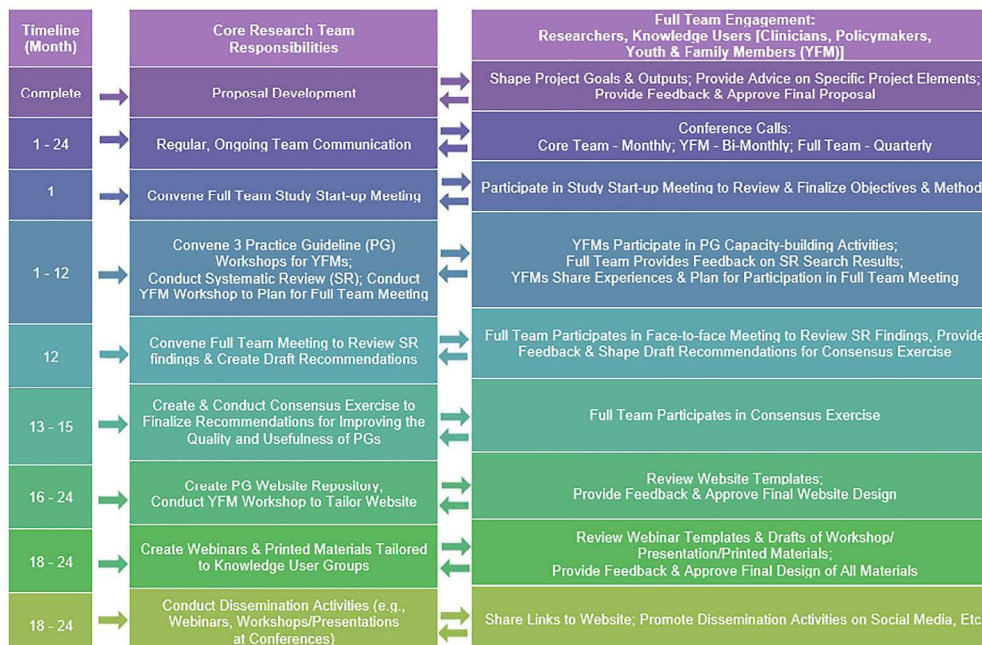

279x215mm (300 x 300 DPI)

For peer review only

1  
2  
3  
4  
5  
6  
7  
8  
9  
10  
11  
12  
13  
14  
15  
16  
17  
18  
19  
20  
21  
22  
23  
24  
25  
26  
27  
28  
29  
30  
31  
32  
33  
34  
35  
36  
37  
38  
39  
40  
41  
42  
43  
44  
45  
46  
47  
48  
49  
50  
51  
52  
53  
54  
55  
56  
57  
58  
59  
60

Figure 2: Website Design Elements

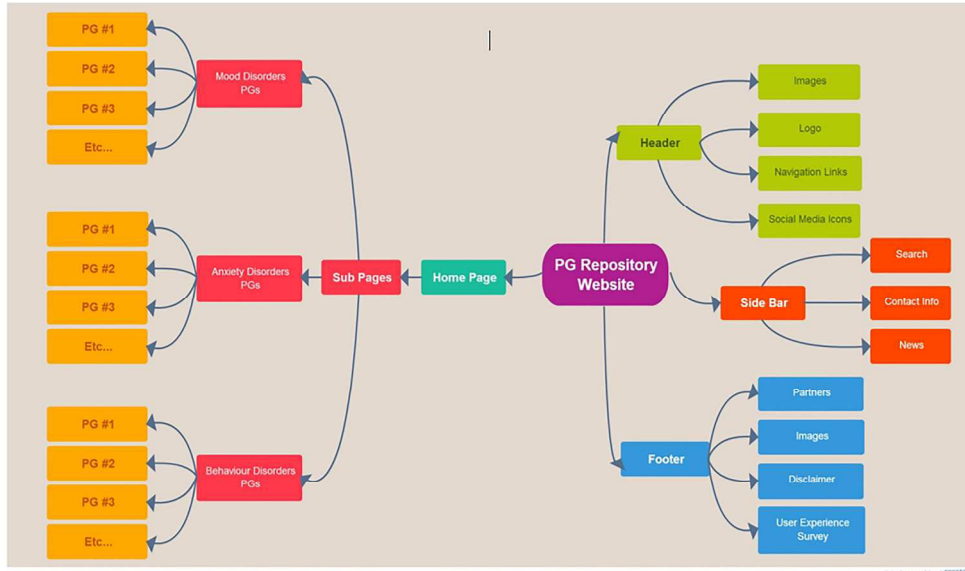

279x180mm (299 x 299 DPI)



## Supplement 1: Detailed Search Strategy for Depression and Anxiety PGs

### Medline-OVID

July 23, 2015

1. exp clinical pathway/
2. exp clinical protocol/
3. exp consensus/
4. exp consensus development conference/
5. exp consensus development conferences as topic/
6. critical pathways/
7. exp guideline/
8. guidelines as topic/
9. exp practice guideline/
10. practice guidelines as topic/
11. health planning guidelines/
12. treatment guidelines.mp.
13. (guideline or practice guideline or consensus development conference or consensus development conference, NIH).pt.
14. (position statement\* or policy statement\* or practice parameter\* or best practice\*).ti,ab.
15. (standards or guideline or guidelines).ti.
16. ((practice or treatment\*) adj guideline\*).ab.
17. (CPG or CPGs).ti.
18. Consensus\*.ti.
19. consensus\*.ab. /freq=2
20. ((critical or clinical or practice) adj2 (path or paths or pathway or pathways or protocol\*)).ti,ab.
21. recommendat\*.ti.
22. (care adj2 (standard or path or paths or pathway or pathways or map or maps or plan or plans)).ti,ab.
23. (algorithm\* adj2 (screening or examination or test or tested or testing or assessment\* or diagnosis or diagnoses or diagnosed or diagnosing)).ti,ab.
24. (algorithm\* adj2 (pharmacotherap\* or chemotherap\* or chemotreatment\* or therap\* or treatment\* or intervention\*)).ti,ab.
25. or/1-24
26. mental disorders/ or anxiety disorders/ or agoraphobia/ or panic disorder/ or phobic disorders/
27. affective disorders, psychotic/ or bipolar disorder/ or depressive disorder/ or depressive disorder, major/ or dysthymic disorder/
28. mental disorders/ or anxiety, separation/ or "attention deficit and disruptive behavior disorders"/ or attention deficit disorder with hyperactivity/ or conduct disorder/
29. oppositional defiant disorder.mp.
30. Mental health/
31. (mental health or emotional health or depression or anxiety or bipolar or dysthymia or agoraphobia or phobia or phobic or panic disorder or conduct disorder or disruptive behavio?r disorder\* or attention deficit).kw,ti.

32. 26 or 27 or 28 or 29 or 30 or 31
33. (pediatric\* or paediatric\* or child\* or adolescent? or youth? or teenager? or teen?).ti,jn.
34. 25 and 32
35. 33 and 34
36. limit 34 to ("all child (0 to 18 years)" or "preschool child (2 to 5 years)" or "child (6 to 12 years)" or "adolescent (13 to 18 years)")
37. 35 or 36
38. limit 37 to english language
39. limit 38 to yr="2005 - 2015"

### EMBASE-OVID

July 23 2015

1. exp clinical pathway/
2. exp clinical protocol/
3. exp consensus/
4. exp consensus development conference/
5. exp consensus development conferences as topic/
6. critical pathways/
7. exp guideline/
8. guidelines as topic/
9. exp practice guideline/
10. practice guidelines as topic/
11. health planning guidelines/
12. treatment guidelines.mp.
13. (guideline or practice guideline or consensus development conference or consensus development conference, NIH).pt.
14. (position statement\* or policy statement\* or practice parameter\* or best practice\*).ti,ab.
15. (standards or guideline or guidelines).ti.
16. ((practice or treatment\*) adj guideline\*).ab.
17. (CPG or CPGs).ti.
18. Consensus\*.ti.
19. consensus\*.ab. /freq=2
20. ((critical or clinical or practice) adj2 (path or paths or pathway or pathways or protocol)).ti,ab.
21. recommendat\*.ti.
22. (care adj2 (standard or path or paths or pathway or pathways or map or maps or plan or plans)).ti,ab.
23. (algorithm\* adj2 (screening or examination or test or tested or testing or assessment\* or diagnosis or diagnoses or diagnosed or diagnosing)).ti,ab.
24. (algorithm\* adj2 (pharmacotherap\* or chemotherap\* or chemotreatment\* or therap\* or treatment\* or intervention\*)).ti,ab.
25. or/1-24
26. exp behavior disorder/ or mental disease/
27. exp anxiety disorder/

28. exp mood disorder/
29. exp mental health/
30. oppositional defiant disorder.mp.
31. (mental health or emotional health or depression or anxiety or bipolar or dysthymia or agoraphobia or phobia or phobic or panic disorder or conduct disorder or disruptive behavior disorder\* or attention deficit).kw,ti.
32. or/26-31
33. 25 and 32
34. limit 33 to (child or preschool child <1 to 6 years> or school child <7 to 12 years> or adolescent <13 to 17 years>)
35. (pediatric\* or paediatric\* or child\* or adolescent? or youth? or teenager? or teen?).ti,jn.
36. 33 and 35
37. 34 or 36
38. limit 37 to english language
39. limit 38 to yr="2005 - 2015"

### PsycINFO-OVID

July 23 2015

1. exp clinical pathway/
2. exp clinical protocol/
3. exp consensus/
4. exp consensus development conference/
5. exp consensus development conferences as topic/
6. critical pathways/
7. exp guideline/
8. guidelines as topic/
9. exp practice guideline/
10. practice guidelines as topic/
11. health planning guidelines/
12. treatment guidelines.mp.
13. (guideline or practice guideline or consensus development conference or consensus development conference, NIH).pt.
14. (position statement\* or policy statement\* or practice parameter\* or best practice\*).ti,ab.
15. (standards or guideline or guidelines).ti.
16. ((practice or treatment\*) adj guideline\*).ab.
17. (CPG or CPGs).ti.
18. Consensus\*.ti.
19. consensus\*.ab. /freq=2
20. ((critical or clinical or practice) adj2 (path or paths or pathway or pathways or protocol)).ti,ab.
21. recommendat\*.ti.
22. (care adj2 (standard or path or paths or pathway or pathways or map or maps or plan or plans)).ti,ab.

- 1  
2  
3 23. (algorithm\* adj2 (screening or examination or test or tested or testing or assessment\*  
4 or diagnosis or diagnoses or diagnosed or diagnosing)).ti,ab.  
5 24. (algorithm\* adj2 (pharmacotherap\* or chemotherap\* or chemotreatment\* or therap\*  
6 or treatment\* or intervention\*)).ti,ab.  
7 25. or/1-24  
8 26. oppositional defiant disorder.mp.  
9 27. (mental health or emotional health or depression or anxiety or bipolar or dysthymia or  
10 agoraphobia or phobia or phobic or panic disorder or conduct disorder or disruptive  
11 behavio?r disorder\* or attention deficit).kw,ti.  
12 28. mental disorders/ or exp anxiety disorders/ or exp impulse control disorders/ or exp  
13 behavior disorders/ or conduct disorder/  
14 29. exp affective disorders/  
15 30. oppositional defiant disorder/  
16 31. or/26-30  
17 32. 25 and 31  
18 33. (pediatric\* or paediatric\* or child\* or adolescent? or youth? or teenager? or  
19 teen?).ti,jn.  
20 34. 32 and 33  
21 35. limit 32 to (childhood or adolescence <13 to 17 years>)  
22 36. 34 or 35  
23 37. limit 36 to english language  
24 38. limit 37 to yr="2005 - 2015"

**CINAHL -EBSCO**

July 23 2015

| Search ID# | Search Terms                                                                                                                      | Search Options                                                                                                                                       |
|------------|-----------------------------------------------------------------------------------------------------------------------------------|------------------------------------------------------------------------------------------------------------------------------------------------------|
| S24        | S23                                                                                                                               | Limiters - Published Date: 20050101-20151231;<br>Language: English<br>Search modes - Boolean/Phrase                                                  |
| S23        | S22                                                                                                                               | Limiters - Age Groups: Infant: 1-23 months, Child, Preschool: 2-5 years, Child: 6-12 years, Adolescent: 13-18 years<br>Search modes - Boolean/Phrase |
| S22        | S14 AND S21                                                                                                                       | Search modes - Boolean/Phrase                                                                                                                        |
| S21        | S15 OR S16 OR S17 OR S18 OR S19 OR S20                                                                                            | Search modes - Boolean/Phrase                                                                                                                        |
| S20        | TI mental health or emotional health or depression or anxiety or bipolar or dysthymia or agoraphobia or phobia or phobic or panic | Search modes - Boolean/Phrase                                                                                                                        |

|     |                                                                                                                                                                                                                        |                               |
|-----|------------------------------------------------------------------------------------------------------------------------------------------------------------------------------------------------------------------------|-------------------------------|
|     | disorder or conduct disorder or disruptive behavior?r disorder* or attention deficit                                                                                                                                   |                               |
| S19 | SU mental health or emotional health or depression or anxiety or bipolar or dysthymia or agoraphobia or phobia or phobic or panic disorder or conduct disorder or disruptive behavior?r disorder* or attention deficit | Search modes - Boolean/Phrase |
| S18 | "oppositional defiant disorder"                                                                                                                                                                                        | Search modes - Boolean/Phrase |
| S17 | "conduct disorder"                                                                                                                                                                                                     | Search modes - Boolean/Phrase |
| S16 | (MH "Anxiety Disorders+")                                                                                                                                                                                              | Search modes - Boolean/Phrase |
| S15 | (MH "Mental Disorders") OR (MH "Neurotic Disorders+") OR (MH "Mental Disorders Diagnosed in Childhood+")                                                                                                               | Search modes - Boolean/Phrase |
| S14 | S1 OR S2 OR S3 OR S4 OR S5 OR S6 OR S7 OR S8 OR S9 OR S10 OR S11 OR S12 OR S13                                                                                                                                         | Search modes - Boolean/Phrase |
| S13 | TX (algorithm* N2 (pharmacotherap* or chemotherap* or chemotreatment* or therap* or treatment* or intervention*))                                                                                                      | Search modes - Boolean/Phrase |
| S12 | TX (algorithm* N2 (screening or examination or test or tested or testing or assessment* or diagnosis or diagnoses or diagnosed or diagnosing))                                                                         | Search modes - Boolean/Phrase |
| S11 | TX (care N2 (standard or path or paths or pathway or pathways or map or maps or plan or plans))                                                                                                                        | Search modes - Boolean/Phrase |
| S10 | TI recommendat*                                                                                                                                                                                                        | Search modes - Boolean/Phrase |
| S9  | TX ((critical or clinical or practice) N2 (path or paths or pathway or pathways or protocol*))                                                                                                                         | Search modes - Boolean/Phrase |
| S8  | TI Consensus*                                                                                                                                                                                                          | Search modes - Boolean/Phrase |
| S7  | TI CPG or CPGs                                                                                                                                                                                                         | Search modes - Boolean/Phrase |
| S6  | AB ((practice or treatment*) N2 guideline*).                                                                                                                                                                           | Search modes - Boolean/Phrase |
| S5  | TI standards or guideline or guidelines                                                                                                                                                                                | Search modes - Boolean/Phrase |
| S4  | TX position statement* or policy statement* or practice parameter* or best practice                                                                                                                                    | Search modes - Boolean/Phrase |

|    |                            |                                  |
|----|----------------------------|----------------------------------|
| S3 | PT practice guidelines     | Search modes -<br>Boolean/Phrase |
| S2 | (MH "Critical Path")       | Search modes -<br>Boolean/Phrase |
| S1 | (MH "Practice Guidelines") | Search modes -<br>Boolean/Phrase |

## Grey Literature Search Terms

### *Guideline Specific Sites*

mental health OR emotional health OR depression OR anxiety OR bipolar OR dysthymia OR agoraphobia OR phobia OR phobic OR panic disorder OR conduct disorder OR disruptive behavior disorder\* OR disruptive behaviour disorder\* OR attention deficit OR oppositional defiant disorder OR mental disorder\* OR emotional disorder\* OR affective disorder\* AND pediatric\* or paediatric\* or child\* or adolescent\* or youth\* or teenager\* or teen\*

### *Other Grey Literature*

mental health OR emotional health OR depression OR anxiety OR bipolar OR dysthymia OR agoraphobia OR phobia OR phobic OR panic disorder OR conduct disorder OR disruptive behavior disorder\* OR disruptive behaviour disorder\* OR attention deficit OR oppositional defiant disorder OR mental disorder\* OR emotional disorder\* OR affective disorder\* AND pediatric\* or paediatric\* or child\* or adolescent\* or youth\* or teenager\* or teen\* AND guideline\* OR CPG\* OR care pathway\* OR consensus statement\* OR best practice OR practice parameter\* OR position statement OR policy statement OR protocol\* OR expert committee

### *Grey Literature Search Sites*

National Guidelines Clearinghouse <http://www.guideline.gov/>  
 Scottish Intercollegiate Guidelines Network (SIGN) <http://www.sign.ac.uk/>  
 Clinical Practice Guidelines Portal (Australia) <https://www.clinicalguidelines.gov.au/>  
 Guidelines International Network <http://www.g-i-n.net/>  
 Canadian Academy of Child and Adolescent Psychiatry (CACAP) [http://www.cacap-acpea.org/en/cacap/Policies\\_amp\\_Guidelines\\_p810.html](http://www.cacap-acpea.org/en/cacap/Policies_amp_Guidelines_p810.html)  
 Canadian Paediatric Society <http://www.cps.ca/en/>  
 The College of Family Physicians of Canada <http://www.cfpc.ca/ForHealthProfessionals/>  
 BC Mental Health & Substance Use Services <http://www.bcmhsus.ca/resources/guidelines-and-protocols>  
 Canadian ADHD Resource Alliance (CADDRA) [http://www.caddra.ca/cms4/index.php?option=com\\_content&view=article&id=26&Itemid=70&lang=en](http://www.caddra.ca/cms4/index.php?option=com_content&view=article&id=26&Itemid=70&lang=en)  
 BCGuidelines.ca <http://www2.gov.bc.ca/gov/content/health/practitioner-professional-resources/bc-guidelines>  
 American Academy of Child and Adolescent Psychiatry (AACAP) <http://www.aacap.org/>  
 YoungMinds <http://www.youngminds.org.uk/search?q=guidelines>

1  
2  
3 Royal College of Paediatrics and Child Health (RCPCH)  
4 [http://www.rcpch.ac.uk/improving-child-health/clinical-guidelines-and-](http://www.rcpch.ac.uk/improving-child-health/clinical-guidelines-and-standards/endorsed-and-supported/child-mental-health)  
5 [standards/endorsed-and-supported/child-mental-health](http://www.rcpch.ac.uk/improving-child-health/clinical-guidelines-and-standards/endorsed-and-supported/child-mental-health)  
6  
7 Ministry of Health Malaysia <http://www.moh.gov.my/index.php/pages/view/149>  
8 Canadian Mental Health Association (CMHA) <http://www.cmha.ca/>  
9 National Institute for Health Care Excellence (NICE) <https://www.nice.org.uk/guidance>  
10 Canadian Medical Association Infobase [https://www.cma.ca/En/Pages/clinical-practice-](https://www.cma.ca/En/Pages/clinical-practice-guidelines.aspx)  
11 [guidelines.aspx](https://www.cma.ca/En/Pages/clinical-practice-guidelines.aspx)  
12 Centre for Addiction and Mental Health (CAMH)  
13 <http://www.camh.ca/en/hospital/Pages/home.aspx>  
14 Mental Health Commission of Canada <http://www.mentalhealthcommission.ca/English/>  
15 Canadian Psychological Association <http://www.cpa.ca/>  
16  
17

18 In addition, a search, using the same terms, was u  
19  
20  
21  
22  
23  
24  
25  
26  
27  
28  
29  
30  
31  
32  
33  
34  
35  
36  
37  
38  
39  
40  
41  
42  
43  
44  
45  
46  
47  
48  
49  
50  
51  
52  
53  
54  
55  
56  
57  
58  
59  
60



**PRISMA-P (Preferred Reporting Items for Systematic review and Meta-Analysis Protocols) 2015 checklist: recommended items to address in a systematic review protocol\***

| Section and topic                 | Item No | Page# | Checklist item                                                                                                                                                                                                                |
|-----------------------------------|---------|-------|-------------------------------------------------------------------------------------------------------------------------------------------------------------------------------------------------------------------------------|
| <b>ADMINISTRATIVE INFORMATION</b> |         |       |                                                                                                                                                                                                                               |
| Title:                            |         |       | Towards High Quality, Useful Practice Guidelines for Child and Youth Mental Health Disorders: Protocol for a Systematic Review and Consensus Exercise.                                                                        |
| Identification                    | 1a      | 1     | Identify the report as a protocol of a systematic review                                                                                                                                                                      |
| Update                            | 1b      | N/A   | If the protocol is for an update of a previous systematic review, identify as such                                                                                                                                            |
| Registration                      | 2       | 3     | If registered, provide the name of the registry (such as PROSPERO) and registration number                                                                                                                                    |
| Authors:                          |         |       |                                                                                                                                                                                                                               |
| Contact                           | 3a      | 1     | Provide name, institutional affiliation, e-mail address of all protocol authors; provide physical mailing address of corresponding author                                                                                     |
| Contributions                     | 3b      | 2     | Describe contributions of protocol authors and identify the guarantor of the review                                                                                                                                           |
| Amendments                        | 4       | N/A   | If the protocol represents an amendment of a previously completed or published protocol, identify as such and list changes; otherwise, state plan for documenting important protocol amendments                               |
| Support:                          |         |       |                                                                                                                                                                                                                               |
| Sources                           | 5a      | 2     | Indicate sources of financial or other support for the review                                                                                                                                                                 |
| Sponsor                           | 5b      | N/A   | Provide name for the review funder and/or sponsor                                                                                                                                                                             |
| Role of sponsor or funder         | 5c      | 2     | Describe roles of funder(s), sponsor(s), and/or institution(s), if any, in developing the protocol                                                                                                                            |
| <b>INTRODUCTION</b>               |         |       |                                                                                                                                                                                                                               |
| Rationale                         | 6       | 4     | Describe the rationale for the review in the context of what is already known                                                                                                                                                 |
| Objectives                        | 7       | 4     | Provide an explicit statement of the question(s) the review will address with reference to participants, interventions, comparators, and outcomes (PICO)                                                                      |
| <b>METHODS</b>                    |         |       |                                                                                                                                                                                                                               |
| Eligibility criteria              | 8       | 5     | Specify the study characteristics (such as PICO, study design, setting, time frame) and report characteristics (such as years considered, language, publication status) to be used as criteria for eligibility for the review |
| Information sources               | 9       | 5     | Describe all intended information sources (such as electronic databases, contact with study authors, trial registers or other grey literature sources) with planned dates of coverage                                         |
| Search strategy                   | 10      | 5     | Present draft of search strategy to be used for at least one electronic database, including planned limits, such that it could be repeated                                                                                    |

|                                    |     |     |                                                                                                                                                                                                                                                  |
|------------------------------------|-----|-----|--------------------------------------------------------------------------------------------------------------------------------------------------------------------------------------------------------------------------------------------------|
| Study records:                     |     |     |                                                                                                                                                                                                                                                  |
| Data management                    | 11a | 5   | Describe the mechanism(s) that will be used to manage records and data throughout the review                                                                                                                                                     |
| Selection process                  | 11b | 5   | State the process that will be used for selecting studies (such as two independent reviewers) through each phase of the review (that is, screening, eligibility and inclusion in meta-analysis)                                                  |
| Data collection process            | 11c | 6   | Describe planned method of extracting data from reports (such as piloting forms, done independently, in duplicate), any processes for obtaining and confirming data from investigators                                                           |
| Data items                         | 12  | 6   | List and define all variables for which data will be sought (such as PICO items, funding sources), any pre-planned data assumptions and simplifications                                                                                          |
| Outcomes and prioritization        | 13  | 6   | List and define all outcomes for which data will be sought, including prioritization of main and additional outcomes, with rationale                                                                                                             |
| Risk of bias in individual studies | 14  | 6   | Describe anticipated methods for assessing risk of bias of individual studies, including whether this will be done at the outcome or study level, or both; state how this information will be used in data synthesis                             |
| Data synthesis                     | 15a | 6   | Describe criteria under which study data will be quantitatively synthesised                                                                                                                                                                      |
|                                    | 15b | 6   | If data are appropriate for quantitative synthesis, describe planned summary measures, methods of handling data and methods of combining data from studies, including any planned exploration of consistency (such as $I^2$ , Kendall's $\tau$ ) |
|                                    | 15c | N/A | Describe any proposed additional analyses (such as sensitivity or subgroup analyses, meta-regression)                                                                                                                                            |
|                                    | 15d | N/A | If quantitative synthesis is not appropriate, describe the type of summary planned                                                                                                                                                               |
| Meta-bias(es)                      | 16  | N/A | Specify any planned assessment of meta-bias(es) (such as publication bias across studies, selective reporting within studies)                                                                                                                    |
| Confidence in cumulative evidence  | 17  | N/A | Describe how the strength of the body of evidence will be assessed (such as GRADE)                                                                                                                                                               |

**\* It is strongly recommended that this checklist be read in conjunction with the PRISMA-P Explanation and Elaboration (cite when available) for important clarification on the items. Amendments to a review protocol should be tracked and dated. The copyright for PRISMA-P (including checklist) is held by the PRISMA-P Group and is distributed under a Creative Commons Attribution Licence 4.0.**

*From: Shamseer L, Moher D, Clarke M, Ghersi D, Liberati A, Petticrew M, Shekelle P, Stewart L, PRISMA-P Group. Preferred reporting items for systematic review and meta-analysis protocols (PRISMA-P) 2015: elaboration and explanation. BMJ. 2015 Jan 2;349(jan02 1):g7647.*

# BMJ Open

## Towards High Quality, Useful Practice Guidelines for Child and Youth Mental Health Disorders: Protocol for a Systematic Review and Consensus Exercise.

|                                 |                                                                                                                                                                                                                                                                                                                                                                                                                                                                                                                                                                                                                                                                                                                                                                                                                                                                                                                                                      |
|---------------------------------|------------------------------------------------------------------------------------------------------------------------------------------------------------------------------------------------------------------------------------------------------------------------------------------------------------------------------------------------------------------------------------------------------------------------------------------------------------------------------------------------------------------------------------------------------------------------------------------------------------------------------------------------------------------------------------------------------------------------------------------------------------------------------------------------------------------------------------------------------------------------------------------------------------------------------------------------------|
| Journal:                        | <i>BMJ Open</i>                                                                                                                                                                                                                                                                                                                                                                                                                                                                                                                                                                                                                                                                                                                                                                                                                                                                                                                                      |
| Manuscript ID                   | bmjopen-2017-018053.R2                                                                                                                                                                                                                                                                                                                                                                                                                                                                                                                                                                                                                                                                                                                                                                                                                                                                                                                               |
| Article Type:                   | Protocol                                                                                                                                                                                                                                                                                                                                                                                                                                                                                                                                                                                                                                                                                                                                                                                                                                                                                                                                             |
| Date Submitted by the Author:   | 04-Dec-2017                                                                                                                                                                                                                                                                                                                                                                                                                                                                                                                                                                                                                                                                                                                                                                                                                                                                                                                                          |
| Complete List of Authors:       | Bennett, Kathryn; McMaster University Faculty of Health Sciences, Health Research Methods, Evidence and Impact (formerly Clinical Epidemiology and Biostatistics)<br>Duda, Stephanie ; McMaster University, Health Research Methods, Evidence and Impact (formerly Clinical Epidemiology and Biostatistics)<br>Brouwers, Melissa; McMaster University<br>Szatmari, Peter; Centre for Addiction and Mental Health<br>Newton, Amanda; University of Alberta<br>McLennan, John; University of Ottawa Department of Psychiatry<br>Sundar, Purnima; Ontario Centre of Excellence for Child and Youth Mental Health<br>Cleverley, Kristin; University of Toronto, Faculty of Nursing<br>Charach, Alice; Hospital for Sick Children<br>Henderson, Joanna; Centre for Addiction and Mental Health, ; University of Toronto Faculty of Medicine, Psychiatry<br>Courtney, Darren; Centre for Addiction and Mental Health<br>Rice, Maureen; McMaster University |
| <b>Primary Subject Heading</b>: | Mental health                                                                                                                                                                                                                                                                                                                                                                                                                                                                                                                                                                                                                                                                                                                                                                                                                                                                                                                                        |
| Secondary Subject Heading:      | Evidence based practice                                                                                                                                                                                                                                                                                                                                                                                                                                                                                                                                                                                                                                                                                                                                                                                                                                                                                                                              |
| Keywords:                       | Child & adolescent psychiatry < PSYCHIATRY, Protocols & guidelines < HEALTH SERVICES ADMINISTRATION & MANAGEMENT, Quality in health care < HEALTH SERVICES ADMINISTRATION & MANAGEMENT                                                                                                                                                                                                                                                                                                                                                                                                                                                                                                                                                                                                                                                                                                                                                               |
|                                 |                                                                                                                                                                                                                                                                                                                                                                                                                                                                                                                                                                                                                                                                                                                                                                                                                                                                                                                                                      |

SCHOLARONE™  
Manuscripts

# Towards High Quality, Useful Practice Guidelines for Child and Youth Mental Health Disorders: Protocol for a Systematic Review and Consensus Exercise.

Kathryn Bennett, PhD, Stephanie Duda, MSc, Melissa Brouwers, PhD, Peter Szatmari, MD, FRCPC, Amanda Newton, BScN, PhD, John McLennan, MD, PhD, Purnima Sundar, PhD, Kristin Cleverley, RN, PhD, Alice Charach, MD, Joanna Henderson, PhD, CPsych, Darren Courtney, MD, FRCPC, Maureen Rice, MA, MLIS

Dr. Bennett and Ms. Duda are with the Department of Health Research Methods, Evidence and Impact (formerly the Department of Clinical Epidemiology and Biostatistics), McMaster University, Hamilton, Ontario.

Dr. Brouwers is with the Departments of Oncology and Health Research Methods, Evidence & Impact (formerly the Department of Clinical Epidemiology and Biostatistics), McMaster University, Hamilton, Ontario

Dr. Szatmari is with the Cundill Centre for Child and Youth Depression, the Child and Youth Mental Health Collaborative, Centre for Addiction and Mental Health, the Hospital for Sick Children, and the University of Toronto, Toronto, Ontario.

Dr. Newton is with the Department of Pediatrics, Faculty of Medicine & Dentistry, University of Alberta, Edmonton, Alberta.

Dr. McLennan is with the Children's Hospital of Eastern Ontario Research Institute and the Department of Psychiatry, University of Ottawa, Ottawa, Ontario and the Department of Pediatrics, University of Calgary, Calgary, Alberta.

Dr. Sundar is the Director of Knowledge Mobilization at the Ontario Centre of Excellence for Child and Youth Mental Health, Ottawa, Ontario.

Dr. Cleverley is with the Lawrence S. Bloomberg Faculty of Nursing, University of Toronto, and the Margaret and Wallace McCain Centre for Child, Youth & Family Mental Health, Centre for Addiction and Mental Health, Toronto, Ontario.

Dr. Charach is with the Hospital for Sick Children and the Department of Psychiatry, University of Toronto, Toronto, Ontario.

Dr. Henderson is with the Margaret and Wallace McCain Centre for Child, Youth & Family Mental Health, Centre for Addiction and Mental Health, and the Department of Psychiatry, University of Toronto, Toronto, Ontario.

Dr. Courtney is with the Cundill Centre for Child and Youth Depression, Centre for Addiction and Mental Health, and the Department of Psychiatry, University of Toronto, Toronto, Ontario.

Ms Rice is with Searchlight Research Services, Hamilton, Ontario.

1  
2  
3  
4  
5  
6 **Correspondence to:** Kathryn Bennett, PhD, 1280 Main Street West, HSC 3V43D,  
7 Hamilton, Ontario L8S 4K1; Email: [kbennett@mcmaster.ca](mailto:kbennett@mcmaster.ca)  
8

9 **Keywords:** Practice Guidelines Child; Adolescent; Mental Health  
10

11 **Author Contributions:** KB conceived the initial idea for the study and is the guarantor of the protocol. KB and  
12 SD wrote the first draft of the protocol. KB, SD, MB, PSz, AN, JM, PS, KC, AC, JH, CC, DC and MR reviewed  
13 multiple versions of the protocol providing critical comment and further developing the methods. KB, SD, MB,  
14 PSz, AN, JM, PS, KC, AC, JH, CC, DC and MR read and approved the final version of the manuscript.  
15

16 **Funding Statement:** This work is supported in part by the Margaret and Wallace McCain Centre for Child, Youth  
17 & Family Mental Health, Centre for Addiction and Mental Health, Toronto, Ontario. The funder had no role in  
18 developing or implementing the study protocol.  
19

20 **Competing Interests Statement:** All authors report they have nothing to declare.  
21

22 **Data Sharing Statement:** The findings from our systematic review and nominal group consensus exercises will  
23 be disseminated through a specially developed website. Additional information can be requested from the  
24 principal investigator.  
25

26 **Acknowledgements:** We thank the members of our youth and adult family member advisory committee (S  
27 Cannon, Z Johnstone, L Langford, G Loucks, A Messaoudi and H Smith) for their contributions to proposal  
28 methods related to youth and adult family member engagement.  
29  
30  
31  
32  
33  
34  
35  
36  
37  
38  
39  
40  
41  
42  
43  
44  
45  
46  
47  
48  
49  
50  
51  
52  
53  
54  
55  
56  
57  
58  
59  
60

## ABSTRACT

**Introduction:** The quality of clinical practice guidelines (PGs) has not been evaluated in child and youth mental health (CYMH). To address this gap we will: i) conduct a systematic review to answer the question 'among eligible PGs relevant to the prevention or treatment of CYMH conditions, which PGs meet criteria for minimum and high quality?; ii) apply nominal group methods to create recommendations for how CYMH PG quality, completeness and usefulness can be strengthened.

**Methods and Analysis:** Systematic Review: Potentially eligible PGs will be identified in 12 databases using a reproducible search strategy developed by a research librarian. Trained raters will: i) apply pre-specified criteria to identify eligible PGs relevant to depression, anxiety, suicidality, bipolar disorder, behaviour disorder [attention-deficit hyperactivity disorder, oppositional defiant disorder, conduct disorder] and substance use disorder; ii) extract descriptive data; and iii) assess PG quality using the Appraisal of Guidelines for Research and Evaluation (AGREE II) tool. Scores on three AGREE-II domains (rigor of development, stakeholder involvement, editorial independence) will designate PGs as minimum ( $\geq 50\%$ ) or high quality ( $\geq 70\%$ ). Nominal Group: Four CYMH PG knowledge-user groups (clinicians, mental health service planners, youth and adult family members) will participate in structured exercises derived using nominal group methods to generate recommendations to improve PG quality, completeness and usefulness.

**Ethics and Dissemination:** Ethics approval is not required. Study products will be disseminated as follows. A cross-platform website will house eligible CYMH PGs and their quality ratings. Twitter and Facebook tools will promote it to a wide variety of PG users. Data from Google Analytics, Twitonomy, and Altmetrics will inform usage evaluation. Complementary educational workshops will be conducted for CYMH professionals. Print materials and journal articles will be produced.

**Registration Details:** PROSPERO 2017:CRD42017060738

## Strengths and Limitations

- This systematic review will provide currently unavailable information about which existing CYMH PGs are trustworthy, and should be used by clinicians, mental health service planners, youth and family members.
- Our protocol adheres to PRISMA- P criteria.
- Nominal group consensus exercises conducted with four different types of PG users will identify how the quality, completeness and usefulness of CYMH PGs can be strengthened.
- The review cannot address barriers and facilitators of successful guideline implementation.
- By focusing on diagnosable conditions, it is possible that some important preventive interventions may not be included.



## INTRODUCTION

Effective interventions are increasingly available to assess, prevent and treat child and youth mental health problems.<sup>1</sup> However, studies repeatedly show that many children and youth experiencing mental health difficulties may not benefit from these interventions. For example, even in resource rich settings only about 20-30% of youth in need are able to obtain any child and youth mental health (CYMH) care.<sup>2</sup> Equally concerning are findings that suggest even when children and youth are able to access CYMH services, the quality of care received is uneven at best, with wide variation in the types of services delivered within a single jurisdiction<sup>3-6</sup> Clinical practice guidelines (PGs) are decision aids that have the potential to help strengthen the quality of CYMH care, and improve CYMH outcomes.<sup>7</sup> The recommendations contained in high quality PGs consist of statements about the comparative benefits and risks of different intervention options, systematically derived using rigorous critical appraisal and research synthesis methodologies. These statements can guide clinical decisions and mental health service planning, reduce variation in the services delivered, and facilitate informed decision-making by youth experiencing mental health difficulties and their family members.<sup>7-9</sup> Numerous CYMH PGs are now available, and leading national and international organizations regularly call for their increased production and use.<sup>10, 11</sup>

The availability of high-quality, 'trustworthy' PGs is a non-negotiable pre-requisite to promoting their development and use.<sup>7</sup> Otherwise, PG implementation may not improve the quality of CYMH care, resulting in little or no mental health benefit to children and youth, and potentially increasing the risk of harm and wasted resources due to the implementation of flawed PG recommendations. PG quality has received considerable attention, particularly in internal medicine and its sub-specialties.<sup>12-14</sup> International criteria have been developed to guide the production of rigorous, clinically trustworthy PGs,<sup>7</sup> and The Appraisal of Guidelines for Research and Evaluation (AGREE II) tool,<sup>15-17</sup> derived from these standards has been used to appraise and improve PG quality relevant to adult chronic disease, and to enable PG users to choose PGs based on quality. More recently the Institute of Medicine (IOM) has proposed eight similar PG quality standards,<sup>18</sup> and work has begun to translate them into a new tool for appraising quality/clinical validity.<sup>19</sup>

In contrast, to date, very little attention has been given to the quality of PGs relevant to CYMH conditions.<sup>20</sup> The need to fill this gap is long overdue. We need to know which available CYMH PGs are trustworthy, and how to design initiatives to strengthen the capacity of the CYMH field to produce high quality, useful PGs. As a first step, we appraised the rigor of the development methods currently used by groups who create CYMH PGs.<sup>20</sup> Five different sets of development methods were identified within 70 individual CYMH PGs. Evaluation of these sets of development methods using both the AGREE II and IOM criteria revealed that roughly 70% of CYMH PGs may not be trustworthy because the methods used to develop them are weak, pointing to the urgent need to evaluate the quality of the actual CYMH PGs. The protocol reported below addresses this need and will proceed in three phases. First, a systematic review will be conducted to answer the question 'Among eligible PGs relevant to the assessment, prevention or treatment of common CYMH conditions, which PGs meet criteria for minimum and high quality?'. The goal is to increase PG user awareness of specific trustworthy CYMH PGs by identifying all available CYMH PGs and determining which ones meet criteria for minimum and high quality standards using the AGREE-II appraisal tool. Second, working with four PG knowledge-user (KU) groups (i.e., clinicians, mental health service planners, youth and adult family members), nominal group methods will

1  
2  
3 be employed to develop recommendations to guide improvements in CYMH PG quality, completeness  
4 and usefulness. The goal is to provide consensus-based statements that can inform capacity building  
5 initiatives including how to strengthen CYMH PG quality through increased attention to rigorous develop  
6 methods, the identification of a core-set of CYMH PGs, how to improve user skills relevant to choosing  
7 PGs based on quality, how to increase the alignment of PG content with different KU group needs, and  
8 how to co-ordinate the work of different PG development groups so that PG quality is strengthened  
9 through increased efficiency and collaboration. Finally, a set of dissemination activities will be undertaken  
10 to make the results of this work widely available to both PG users and developers.  
11  
12

## 13 14 **METHODS AND ANALYSIS**

### 15 **Systematic Review (SR) Methods**

16  
17  
18 Our methods adhere to Cochrane Collaboration<sup>21</sup> and PRISMA standards [Preferred Reporting Items for  
19 Systematic Reviews/Meta-analyses and Protocols].<sup>22, 23</sup>  
20  
21

22 **Research Question:** Among eligible PGs relevant to the assessment, prevention or treatment of  
23 common CYMH conditions, which PGs meet criteria for minimum and high quality?  
24

25 **Eligibility Criteria:** Documents identified using the search strategy described below will be deemed  
26 eligible if they meet the following criteria: (i) English language; (ii) documents labeled practice guideline,  
27 practice parameter, or consensus or expert committee recommendations, or documents with the explicit  
28 objective or methods to develop original guidance/recommendations; (iii) published, revised, updated or  
29 reaffirmed between 2005-2017; (iv) address the assessment, prevention or treatment of one of the  
30 following CYMH disorder groups (as defined by DSM-5),<sup>24</sup> mood (major depressive disorder, dysthymia,  
31 bipolar disorder), anxiety (agoraphobia, generalized anxiety disorder, social phobia, specific phobia, panic  
32 disorder, separation anxiety disorder), self-harm/suicidality, disruptive behavior (attention deficit  
33 hyperactivity disorder, oppositional defiant disorder, conduct disorder) and substance use disorders; and  
34 (v) relevant to children and youth ≤ 18 years of age. Documents meeting the foregoing inclusion criteria  
35 will be excluded if judged to be a narrative or systematic literature review that contains summary  
36 statements regarding clinical implications/recommendations.  
37  
38  
39

40 **Information Sources:** Following advice from an experienced health research librarian (Rice), we will  
41 search Medline, EMBASE, PsycINFO and CINAHL. Our grey literature search will include PG specific  
42 sites (i.e., National Guideline Clearinghouse, Canadian Medical Association Infobase, National Institute  
43 for Health and Care Excellence, Guidelines International Network International Guideline Library,  
44 Australia's Clinical Practice Guidelines Portal and New Zealand Guidelines Group). It will also target  
45 mental health-related organizations (e.g., American Academy of Child and Adolescent Psychiatry;  
46 Canadian Mental Health Association) and include a broad search using Google. All searches will be  
47 supplemented by: screening reference lists of eligible PGs; using cited reference searching to reference  
48 forward eligible PGs; hand-searching key journals; soliciting recommendations from team members.  
49  
50  
51

52 **Search Strategy:** Our research librarian will use a strategy that combines subject heading and text terms  
53 for mental health AND guidelines AND children/adolescents. The strategy will be developed in Medline  
54  
55

1  
2  
3 and then translated to terms appropriate to other databases and peer reviewed.<sup>25</sup> A draft search strategy  
4 is provided in supplementary file 1.  
5

6 **Information Management:** Search results will be stored using bibliographic management software.  
7

8 **Selection Process:** One methodologist with expertise in the identification and quality assessment of PGs  
9 will independently screen the titles and abstracts of all unduplicated identified records using Reference  
10 Manager software. Only documents that clearly do not meet our inclusion criteria will be excluded at this  
11 stage, for example, title and/or abstract unambiguously indicates that the document: i) is specific to  
12 adults; ii) does not address one or more of the target CYMH disorders; or iii) publication date is prior to  
13 2005. All remaining documents will proceed to full-text screening by two reviewers. A research assistant  
14 will obtain full-text records for all potentially relevant documents identified during title and abstract  
15 screening. Then two methodologists working independently will apply the inclusion criteria to full-text  
16 documents to identify eligible PGs. Disagreements regarding eligibility are then identified and resolved  
17 through discussion with the principal investigator (PI).  
18  
19  
20

21 **Data Items and Collection Process:** A trained research staff member will extract descriptive data for  
22 each eligible PG using a standardized form to capture: date produced; author; organization type  
23 (government, medical society, special group, other); country of origin; CYMH disorder; target population  
24 (children and youth only; children, youth and adults); guideline purpose (assessment, prevention,  
25 treatment). Training will include refinement of item rewording as needed to improve clarity.  
26  
27

28 **PG Quality Assessment Methods, Raters, Training:** PG quality ratings will be conducted using AGREE  
29 II.<sup>17</sup> This validated tool is used widely and consists of 23 questions grouped in 6 domains: scope and  
30 purpose, stakeholder involvement, rigor of development, clarity of presentation, applicability, editorial  
31 independence. Two additional items assess overall quality. Item response options range from 1 to 7. Two  
32 reviewers (MSc in research methods) will participate in a three stage training exercise: completion of the  
33 online AGREE II Overview Tutorial,<sup>26</sup> a detailed review of the AGREE II User's Manual,<sup>17</sup>; and an online  
34 practice assessment of an example PG.<sup>27</sup> Reviewers will meet with the principal investigator to review  
35 disagreements and 'lessons learned' about AGREE II. Following training, the two reviewers will  
36 independently apply AGREE II criteria to eligible PGs using the My AGREE PLUS online platform.<sup>28</sup> For  
37 each item, reviewers will indicate their score and justify it by recording document page and paragraph  
38 numbers for the information supporting each item in the comment box. When applying AGREE II criteria,  
39 reviewers will ensure that any companion documents for a given PG (e.g., tools and resources to aid PG  
40 implementation, technical reports, health economic analyses, PG evaluation tools, etc. referenced in the  
41 main document) were considered in addition to the main PG document. Once the two raters have  
42 completed their independent AGREE-II ratings, inter-rater differences  $\geq 2$  points on initial item scores will  
43 be identified and discussed by the two raters and the PI. This cut-point has been chosen as it is both  
44 pragmatic and conservative with respect to capturing scoring differences that arise from misinformation  
45 (i.e., guideline documents are often very long and detailed and it is possible that a reviewer may simply  
46 miss important information) rather than differences in judgment regarding the content of the guideline  
47 documentation. Following discussion, reviewers are asked to reconsider and possibly revise their item  
48 scores; however, numerical agreement on the score assigned for each AGREE II item is not required.  
49 Thus, scoring differences that occur due to missed information in the documentation should be resolved  
50 during the discussion of disagreements. Any differences that remain following discussion should  
51  
52  
53  
54  
55  
56  
57  
58  
59  
60

1  
2  
3 represent between rater differences in judgment (rather than failure to detect specific pieces of  
4 information within PG documents). Final item scores will then be aggregated into 6 domain scores by  
5 summing both reviewers' scores for all items within a given domain and standardizing as a percentage of  
6 the maximum possible score (ranging from 0-100%) using the formula described in the AGREE II User's  
7 Manual.<sup>17</sup>  
8

9  
10 ***PG High and Minimum Quality Rating Criteria:*** The AGREE II User's Manual does not provide criteria  
11 to designate PGs as high or low quality. Thus, the interpretation of domain scores and overall PG quality  
12 assessments are determined by the user. We will use scores on three AGREE II domains - stakeholder  
13 involvement, rigor of development (that is, rigorous consideration of the relevant research evidence  
14 base), and editorial independence (management of academic and financial conflict of interest) - to classify  
15 PGs according to quality. Minimum quality PGs will be defined as those that receive a domain score  $\geq$   
16 50% on all three domains. High quality PGs will be defined as those that obtain a domain score  $\geq$  70% on  
17 all three domains. We selected these three domains because they address the extent to which risk of bias  
18 is minimized in the identification and interpretation of the research evidence used to derive the guideline  
19 recommendations. The remaining three domains, although important, do not evaluate the clinical validity  
20 and trustworthiness of the PG; rather they focus on the problem statement, clarity of presentation and  
21 implementability.  
22  
23

24  
25 Data Synthesis and Statistical Techniques:

26  
27 PG Characteristics: Descriptive statistics (means, proportions) will be used to summarize eligible PG  
28 characteristics.  
29

30 Rater Agreement for AGREE-II Scores: We will calculate the intraclass correlation coefficient (ICC) to  
31 assess inter-rater agreement<sup>29</sup> and use Fleiss' categories to classify the level of agreement: poor (0-  
32 0.40), fair to good (0.41-0.75), and excellent ( $> 0.75$ ).<sup>30</sup> SPSS, version 23 will be used to perform the  
33 statistical analyses.  
34  
35

36 Guideline Quality: To answer our SR research question, each eligible PG will be classified as high quality  
37 or minimum quality using the AGREE-II methods and classification criteria described above. The  
38 remaining individual domain scores for each PG will be reported for descriptive purposes. Our narrative  
39 summary will address the extent to which guidelines deemed high quality and minimum quality also  
40 perform well on the other three domains (i.e., achieve our score cut-offs for minimum and high quality).  
41  
42

43 The six domain scores and overall guideline quality scores will also be used to describe the overall quality  
44 of CYMH guidelines. More specifically, mean domain scores and mean overall guideline quality scores  
45 for each disorder group will be calculated, and a narrative synthesis of guideline methodologic strengths  
46 and weaknesses will be conducted.  
47

48 The mean domain scores and overall scores for each guideline will also be grouped by source developer  
49 (e.g., government agency, specialty society, independent expert group or other) to explore descriptively  
50 the extent to which each of these groups are more or less likely to produce high quality guidelines than  
51 other groups. Again, narrative synthesis methods will be used to summarize these findings.  
52  
53  
54  
55

### *Nominal Group Methods*

Research Question: How can the quality and usefulness of PGs for CYMH disorders be strengthened?

To develop recommendations to guide future CYMH PG development, we will convene four CYMH PG knowledge-user groups, namely clinicians, mental health service planners, youth and adult family members and engage them in a series of structured exercises derived using nominal group methods and the findings of the SR.<sup>31, 32</sup>

Recommendation Development Group (RDG) Membership: Group membership influences the outcomes of consensus exercises. Heterogeneous groups representing the range of relevant perspectives are preferred as they are more likely to produce judgments that reflect a conservative or middle ground.<sup>7, 33</sup> Accordingly, for each PG user group, we will form groups composed of 10 individuals. Clinicians and mental health service planners will be identified through nominations by project team investigators. Youth (aged 8 to 18 years) and adult family members will be nominated by the members of our youth and adult family member advisory committee (see section below re committee membership and involvement to date in protocol development). Once the four groups are assembled, members will be asked if important viewpoints are not represented, and additional members (up to 3) will be invited to participate as needed.

Managing Conflict of Interest: Methods consistent with current international standards will be used.<sup>34</sup> RDG participants will be asked to disclose financial or intellectual conflicts relevant to CYMH PG development. The project principal investigator in consultation with other co-investigators as needed will review all disclosed conflicts and make decisions regarding whether an individual should be recused from all or a portion of the recommendation development exercise.

Generating Recommendations: A structured questionnaire, face-to-face meeting interactions and on-line rating derived from nominal group methods will be used.

Structured Pre-Meeting Questionnaire: RDG members will respond to an electronic questionnaire prior to a face-to-face meeting. The content of the questionnaire will be derived from the findings of the SR and supported by relevant supplemental information. Provisional questions include:

1. i) Using AGREE II as a framework and the SR findings, how should minimum quality standards for CYMH PGs be defined? ii) Based on the results of the SR, what methodologic quality criteria should be the focus of capacity building initiatives designed to improve PG quality? 2. What CYMH PGs constitute a core set (including a rationale based on prevalence and burden of illness)? 3. What content and PG development processes are needed to ensure that PGs are useful to specific types of KUs: i) clinicians (child psychiatrists, family physicians, pediatricians, nurses, psychologists and social workers); ii) mental health service planners in provincial government ministries, hospitals and community agencies; iii) children and youth; and iv) adult family members? 4. How can increased collaboration between PG development groups be encouraged in order to strengthen PG quality and usefulness, and reduce duplication?

Each question will be linked to supplemental material based on SR findings and/or the content of the minimum and high quality PGs. For example, for question 1 the quality ratings for each PG (i.e., domain scores) will be presented in tabular form. Each RDG participant will be asked to indicate whether each



1  
2  
3 domain is relevant to defining minimum quality standards, and if so what score cut-point should be used?  
4 Similarly, participants will be asked to define high quality using the AGREE-II domains. For provisional  
5 question 3 (What content and PG development processes are needed to ensure that PGs are useful to  
6 specific types of PG-users?), each RDG participant will be provided with electronic access to  
7 supplementary materials (e.g., template summary of PG content, template summary of PG development  
8 process, copy of actual PG) derived from the minimum and high quality PGs, and asked to identify  
9 specific aspects of the content and developmental processes that are essential and/or missing from their  
10 user perspective.  
11  
12

13 Face-to-Face Meeting: First, the SR findings and collated pre-meeting questionnaire results will be  
14 reviewed in a large group session. Then each KU group will work independently in small groups with an  
15 expert facilitator who is not part of the research team to draft recommendations related to each pre-  
16 meeting question. The goal is to ensure that each PG user group has an equal voice, and that all  
17 individuals have the opportunity to express their views. Each small group will then report their draft  
18 recommendations for each question to the full group. The principal investigator will collate draft  
19 recommendations into a final provisional set for review in the final session of the day. The final set will  
20 include draft recommendations that are common to all four PG user groups and draft recommendations  
21 that are unique to a specific PG-user group.  
22  
23  
24

25 Generating Final Recommendations and Quantifying the Level of Consensus: We will finalize the content  
26 of the recommendations drafted in the face-to-face meeting and quantify RDG member agreement (0 to  
27 100%) for each recommendation as follows. First, forty-eight hours after the face-to-face meeting, RDG  
28 members will indicate their level of agreement with each draft recommendation using a 7-point scale (1 =  
29 strongly disagree; 7 = strongly agree). Ratings will be collected anonymously in an online survey. RDG  
30 members will then be provided with a summary of scores, and participate in a conference call one week  
31 later to discuss and revise each recommendation as necessary. Finally, RDG members will re-rate their  
32 agreement with each revised recommendation in a second anonymous online exercise. Although  
33 consensus (i.e., 100% agreement among RDG members on the rating assigned to a recommendation)  
34 may be achieved for a specific recommendation, this is not our aim. Quantifying the extent of variation in  
35 agreement/disagreement with the recommendations produced is an integral part of accurate  
36 communication of RDG views.<sup>7</sup>  
37  
38  
39

#### 40 *Youth and Family Member Participation in Protocol Development and Preparation Prior to* 41 *Project Startup* 42 43

44 Informed by patient and public involvement methodology, we have already convened a youth and adult  
45 family member advisory group (4 youth, 2 adult family members) to provide leadership throughout the  
46 project.<sup>9</sup> During proposal development, this group first planned the type of involvement they wished to  
47 have in the project using the following 'meaningful engagement' continuum: consultation, involvement,  
48 partnership and shared leadership.<sup>35, 36</sup> The results of their deliberations are as follows. First they will  
49 participate as learners in the SR to understand PGs and quality appraisal methods. Then, with this  
50 preparation, their goal in subsequent project stages will be participation/shared leadership (e.g., develop  
51 recommendations for how PGs can be more acceptable/useful to youth and adult family members; create  
52 dissemination tools tailored to the needs of youth and adult family members). Specific processes and  
53  
54  
55

1  
2  
3 roles are aligned with engagement principles including reciprocal relationships, co-learning, partnerships,  
4 transparency, honesty, trust.<sup>35, 36</sup>  
5

### 6 *Training Workshops for Youth and Family Members*

7  
8 Four training workshops for youth and adult family members will be conducted prior to participating in the  
9 SR, structured nominal group exercises, face-to-face meeting, online survey and conference call. First,  
10 youth and adult family members will participate in three half-day workshops to learn about PGs and the  
11 AGREE II quality assessment process. The goal is to support capacity development, and facilitate their  
12 engagement in the SR and recommendation development process. The first workshop will include a 1:1  
13 orientation for each individual and a 'Terms of Reference (ToFR) document will be co-developed with the  
14 entire group. This document will capture the core engagement principals that guide our project and the  
15 continuum of meaningful engagement we are utilizing (see preceding section). Workshop one will also  
16 address processes to support conflict resolution and clinical support.  
17  
18  
19

20 A fourth workshop will be convened prior to the full team meeting focusing on recommendation  
21 development to: i) prepare youth and adult family members for their role in generating recommendations  
22 relevant to PG acceptability/usefulness; and ii) enable them to provide input into the full team meeting  
23 agenda to ensure a meaningful process that facilitates youth and adult family member engagement in the  
24 deliberations and decisions.  
25  
26

27 We will also conduct briefing sessions prior to and following each workshop, and provide ongoing support  
28 as appropriate to facilitate sustained engagement.  
29  
30  
31

### 32 *Integrated Knowledge Translation*

33  
34 Throughout the project, we will use integrated knowledge translation (iKT) methods to ensure our goals  
35 and outputs are relevant to the needs of our four KU user groups.<sup>37</sup> Figure 1 illustrates how the core  
36 project team will interact with our full team of researchers and KUs to accomplish our iKT goals in each  
37 project stage.  
38  
39

### 40 *Potential Challenges*

41  
42 Conflict of Interest: If not managed appropriately, conflict of interest could introduce bias into our work.  
43 We will address this risk as follows. First, AGREE II will be applied by MSc level raters with no potential  
44 for intellectual or financial conflict of interest that might systematically bias ratings. Second, conflicts  
45 among RDG members will be declared and managed as described above. Number of PGs: Our pilot work  
46 shows that the number of PGs that meet our eligibility criteria can be rated with AGREE II in the timeline  
47 proposed (2 years). Team Member Engagement: All team members have reviewed our project activities  
48 and timeline and have provided written commitments to participate in project activities as shown in Figure  
49 1. Youth and Adult Family Member Engagement: This is an area of demonstrated expertise for one of our  
50 team members (PS). She has already convened our youth and adult family member advisory group, and  
51 successfully engaged them in planning their involvement in each stage of the project.  
52  
53  
54  
55  
56  
57  
58  
59  
60



## ETHICS AND DISSEMINATION

**Ethics:** This systematic review and consensus exercise protocol is considered a quality improvement initiative and hence, does not require ethics approval<sup>38</sup>

**Web-based PG Repository Platform to Disseminate Quality Assessed PGs:** A cross-platform (i.e., desktop, tablet, and smartphone accessible) website will be created including content tabs to facilitate navigation, a contact form for users to submit questions and a user experience survey to solicit feedback. Figure 2 presents website design elements.

**Website Promotion:** To disseminate our findings and increase PG user knowledge of trustworthy CYMH PGs, we will launch a social media campaign to engage with the CYMH community using Twitter and Facebook, aiming for 3 posts per week. Posts will include PG content, links to PGs, project updates/summaries and news pieces. KUs will also be invited to promote our website through their Twitter accounts.

**Evaluation:** Data from Google Analytics,<sup>39</sup> Twitonomy<sup>40</sup> and Altmetric<sup>41</sup> inform evaluation of website usage.

**Youth and Adult Family Member Website Workshop:** A half-day workshop will be held to enable youth and family members to review website planning with our web/media expert and integrate youth and family member preferences and needs.

**Webinar:** Representatives of each of the four KU groups will participate in webinar development to ensure it meets their needs, and invite their members to participate in one of the four planned webinar offerings.

**Manuscripts:** At least two peer-reviewed open-access publications will be developed.

**Written Materials:** Tailored project summaries, developed with input from our KU groups will be hosted on our website and shared with our KU partners.

**Workshops:** Workshops and presentations will be held at KU meetings [e.g., PolicyWise for Children and Families event, Canadian Academy of Child and Adolescent Psychiatry (CACAP) conference, Canadian Pediatric Society (CPS) conference, College of Family Physicians of Canada (CFPC) Family Health Forum, Healthy Child Manitoba event, Ontario Centre of Excellence in Child and Youth Mental Health partners (e.g., Parents for Children's Mental Health; The New Mentality), Ontario Ministries [Children and Youth Services (MCYS), Health and Longterm Care (MOHLTC), Education (EDU)].

## CONCLUDING STATEMENT

Children and youth deserve the best possible mental health services. To this end, this synthesis, informed by user needs (clinicians, mental health service planner, youth, adult family members) will: advance knowledge by identifying trustworthy CYMH PGs, and documenting the strengths and weaknesses of existing CYMH PGs; guide future PG development by formulating recommendations for how to improve

1  
2  
3  
4  
5  
6  
7  
8  
9  
10  
11  
12  
13  
14  
15  
16  
17  
18  
19  
20  
21  
22  
23  
24  
25  
26  
27  
28  
29  
30  
31  
32  
33  
34  
35  
36  
37  
38  
39  
40  
41  
42  
43  
44  
45  
46  
47  
48  
49  
50  
51  
52  
53  
54  
55  
56  
57  
58  
59  
60

CYMG PG quality, completeness and usefulness; and facilitate knowledge application by creating user informed dissemination tools to promote the use of high quality PGs.

For peer review only

## REFERENCE LIST

1. Patel V, Flisher AJ, Hetrick S, McGorry P. Mental health of young people: a global public-health challenge. *Lancet* 2007;369(9569):1302-13. <https://www.ncbi.nlm.nih.gov/pubmed/17434406>.
2. Merikangas KR, He JP, Burstein M, et al. Service utilization for lifetime mental disorders in U.S. adolescents: results of the National Comorbidity Survey-Adolescent Supplement (NCS-A). *J Am Acad Child Adolesc Psychiatry* 2011;50(1):32-45. <https://www.ncbi.nlm.nih.gov/pubmed/21156268>.
3. Garland AF, Bickman L, Chorpita BF. Change what? Identifying quality improvement targets by investigating usual mental health care. *Adm Policy Ment Health* 2010;37(1-2):15-26. <https://www.ncbi.nlm.nih.gov/pubmed/20177769>.
4. Weisz JR, Sandler IN, Durlak JA, Anton BS. Promoting and protecting youth mental health through evidence-based prevention and treatment. *Am Psychol* 2005;60(6):628-48. <https://www.ncbi.nlm.nih.gov/pubmed/16173895>.
5. Chagnon F, Pouliot L, Malo C, Gervais MJ, Pigeon ME. Comparison of determinants of research knowledge utilization by practitioners and administrators in the field of child and family social services. *Implement Sci* 2010;5:41. <https://www.ncbi.nlm.nih.gov/pubmed/20525270>.
6. Hoagwood K, Burns BJ, Weisz J. A profitable conjunction: from science to service in children's mental health. In: Burns BJ, Hoagwood K, eds. *Community treatment for youth: Evidence-based interventions for severe emotional and behavioural disorders*. New York, NY: Oxford University Press 2002:327-38.
7. Institute of Medicine (US) Committee on Standards for Developing Trustworthy Clinical Practice Guidelines. *Clinical practice guidelines we can trust*. Washington, DC: National Academies Press (US). 2011. Available from: <https://www.ncbi.nlm.nih.gov/books/NBK209539/>.
8. Vernooij RW, Willson M, Gagliardi AR. Characterizing patient-oriented tools that could be packaged with guidelines to promote self-management and guideline adoption: a meta-review. *Implement Sci* 2016;11:52. <https://www.ncbi.nlm.nih.gov/pubmed/27079375>.
9. Légaré F, Boivin A, van der Weijden T, et al. Patient and public involvement in clinical practice guidelines: a knowledge synthesis of existing programs. *Med Decis Making* 2011;31(6):E45-74. <https://www.ncbi.nlm.nih.gov/pubmed/21959267>.
10. Mental Health Commission of Canada. *Changing directions, changing lives: the mental health strategy for Canada*. Calgary, AB: Author. 2012. Available from: <http://strategy.mentalhealthcommission.ca/pdf/strategy-images-en.pdf>.
11. World Health Organization. *WHO handbook for guideline development*. Geneva: World Health Organization. 2011. Available from: [http://apps.who.int/iris/bitstream/10665/75146/1/9789241548441\\_eng.pdf](http://apps.who.int/iris/bitstream/10665/75146/1/9789241548441_eng.pdf).
12. Shaneyfelt TM, Mayo-Smith MF, Rothwangl J. Are guidelines following guidelines? The methodological quality of clinical practice guidelines in the peer-reviewed medical literature. *JAMA* 1999;281(20):1900-5. <https://www.ncbi.nlm.nih.gov/pubmed/10349893>.
13. Alonso-Coello P, Irfan A, Sola I, et al. The quality of clinical practice guidelines over the last two decades: a systematic review of guideline appraisal studies. *Qual Saf Health Care* 2010;19(6):e58. <https://www.ncbi.nlm.nih.gov/pubmed/21127089>.

14. Kung J, Miller RR, Mackowiak PA. Failure of clinical practice guidelines to meet institute of medicine standards: Two more decades of little, if any, progress. *Arch Intern Med* 2012;172(21):1628-33. <https://www.ncbi.nlm.nih.gov/pubmed/23089902>.
15. Brouwers MC, Kho ME, Browman GP, et al. Development of the AGREE II, part 1: performance, usefulness and areas for improvement. *CMAJ* 2010;182(10):1045-52. <https://www.ncbi.nlm.nih.gov/pubmed/20513780>.
16. Brouwers MC, Kho ME, Browman GP, et al. Development of the AGREE II, part 2: assessment of validity of items and tools to support application. *CMAJ* 2010;182(10):E472-E78. <http://www.ncbi.nlm.nih.gov/pmc/articles/PMC2900368/>.
17. Agree Next Steps Consortium. AGREE-II user's manual 2010-2014 [updated 2013. Available from: <http://www.agreetrust.org> Accessed 06/03/2014.
18. Ransohoff DF, Pignone M, Sox HC. How to decide whether a clinical practice guideline is trustworthy. *JAMA* 2013;309(2):139-40. <https://www.ncbi.nlm.nih.gov/pubmed/23299601>.
19. Developing and testing the National Guideline Clearinghouse extent adherence to trustworthy standards instrument [oral presentation]. 13th Guidelines International Network (G-I-N) Conference [program], 2016.
20. Bennett K, Gorman DA, Duda S, Brouwers M, Szatmari P. Practitioner Review: On the trustworthiness of clinical practice guidelines - a systematic review of the quality of methods used to develop guidelines in child and youth mental health. *J Child Psychol Psychiatry* 2016;57(6):662-73. <https://www.ncbi.nlm.nih.gov/pubmed/26945803>.
21. Higgins JPT, Green Se. Cochrane Handbook for Systematic Reviews of Interventions Version 5.1.0 [updated March 2011]: The Cochrane Collaboration; 2011 [Available from: <http://handbook.cochrane.org/> Accessed 02/06/2011.
22. Moher D, Liberati A, Tetzlaff J, Altman DG. Preferred Reporting Items for Systematic Reviews and Meta-Analyses: the PRISMA statement. *J Clin Epidemiol*;62(10):1006-12. <http://dx.doi.org/10.1016/j.jclinepi.2009.06.005>.
23. Shamseer L, Moher D, Clarke M, et al. Preferred reporting items for systematic review and meta-analysis protocols (PRISMA-P) 2015: elaboration and explanation. *BMJ* 2015;349:g7647. <https://www.ncbi.nlm.nih.gov/pubmed/25555855>.
24. American Psychiatric Association. Diagnostic and statistical manual of mental disorders, Fifth Edition. Arlington, VA. 2013. Available from: <https://psicovaleiro.files.wordpress.com/2014/06/dsm-v-manual-diagnc3b3stico-y-estadc3adstico-de-los-trastornos-mentales.pdf>.
25. CADTH. Peer review checklist for search strategies. Toronto, ON. Canadian Agency for Drugs and Technologies in Health (CADTH). 2016. Available from: <https://www.cadth.ca/resources/finding-evidence/press>.
26. The AGREE Research Trust. AGREE II overview tutorial 2010-2014 [Available from: <http://www.agreetrust.org/resource-centre/agree-ii-training-tools/> Accessed 01/05/2016.
27. The AGREE Research Trust. AGREE II tutorial + practice exercise 2010-2014 [Available from: <http://www.agreetrust.org/resource-centre/agree-ii-training-tools/> Accessed 01/05/2016.

- 1
- 2
- 3 28. The AGREE Research Trust. My AGREE PLUS 2010-2014 [Available from:  
4 <http://www.agreetrust.org/login/> Accessed 01/05/2016.
- 5
- 6 29. Fleiss JL, Cohen J. The equivalence of weighted kappa and the intraclass correlation coefficient  
7 as measures of reliability. *Educ Psychol Meas* 1973;33(3):613-19.  
8 <http://journals.sagepub.com/doi/abs/10.1177/001316447303300309>.
- 9
- 10 30. Fleiss JL, Cohen J. Statistical methods for rates and proportions. 2nd ed. New York, NY: John  
11 Wiley 1981:352.
- 12
- 13 31. Jones J, Hunter D. Consensus methods for medical and health services research. *BMJ*  
14 1995;311(7001):376-80. <https://www.ncbi.nlm.nih.gov/pubmed/7640549>.
- 15
- 16 32. Fink A, Kosecoff J, Chassin M, Brook RH. Consensus methods: characteristics and guidelines for  
17 use. *Am J Public Health* 1984;74(9):979-83. <https://www.ncbi.nlm.nih.gov/pubmed/6380323>.
- 18
- 19 33. Hutchings A, Raine R. A systematic review of factors affecting the judgments produced by formal  
20 consensus development methods in health care. *J Health Serv Res Policy* 2006;11(3):172-9.  
21 <https://www.ncbi.nlm.nih.gov/pubmed/16824265>.
- 22
- 23 34. Schünemann HJ, Osborne M, Moss J, et al. An official American Thoracic Society Policy  
24 statement: managing conflict of interest in professional societies. *Am J Respir Crit Care Med*  
25 2009;180(6):564-80. <https://www.ncbi.nlm.nih.gov/pubmed/19734351>.
- 26
- 27 35. Patient Centered Outcomes Research Institute (PCORI). PCORI Engagement Rubric 2014  
28 [Available from: <http://www.pcori.org/sites/default/files/Engagement-Rubric.pdf> Accessed  
29 02/02/2016.
- 30
- 31 36. Carman KL, Dardess P, Maurer M, et al. Patient and family engagement: a framework for  
32 understanding the elements and developing interventions and policies. *Health Aff (Millwood)*  
33 2013;32(2):223-31. <https://www.ncbi.nlm.nih.gov/pubmed/23381514>.
- 34
- 35 37. CIHR. Guide to knowledge translation planning at CIHR: integrated and end-of-grant approaches.  
36 Ottawa, ON. Canadian Institutes for Health Research (CIHR). 2012. Available from:  
37 [http://www.cihr-irsc.gc.ca/e/documents/kt\\_lm\\_ktplan-en.pdf](http://www.cihr-irsc.gc.ca/e/documents/kt_lm_ktplan-en.pdf).
- 38
- 39 38. Canadian Institutes of Health Research, Natural Sciences and Engineering Research Council of  
40 Canada, and Social Sciences and Humanities Research Council of Canada. Tri-Council Policy  
41 Statement. Ethical conduct for research involving humans. 2014. Available from:  
42 [http://www.pre.ethics.gc.ca/pdf/eng/tcps2-2014/TCPS\\_2\\_FINAL\\_Web.pdf](http://www.pre.ethics.gc.ca/pdf/eng/tcps2-2014/TCPS_2_FINAL_Web.pdf).
- 43
- 44 39. Google. Google analytics 2017 [Available from: <http://www.google.com/analytics> Accessed  
45 05/12/2015.
- 46
- 47 40. Diginomy Pty Ltd. Twitonomy 2017 [Available from: <https://www.twitonomy.com/> Accessed  
48 05/12/2015.
- 49
- 50 41. Altmetric. Altmetric 2017 [Available from: <https://www.altmetric.com/> Accessed 05/12/2015.
- 51
- 52
- 53
- 54
- 55
- 56
- 57
- 58
- 59
- 60

1  
2  
3  
4  
5  
6  
7  
8  
9  
10  
11  
12  
13  
14  
15  
16  
17  
18  
19  
20  
21  
22  
23  
24  
25  
26  
27  
28  
29  
30  
31  
32  
33  
34  
35  
36  
37  
38  
39  
40  
41  
42  
43  
44  
45  
46  
47  
48  
49  
50  
51  
52  
53  
54  
55  
56  
57  
58  
59  
60

Figure Legends

Figure 1: Team members will conduct their work over a 24 month period as described in the steps shown.

Figure 2: Our practice guideline respository website will be structured as shown providing access to quality appraised guidelines organized by disorder.

For peer review only

Figure 1: Integrated Knowledge Translation Approach and Timeline



279x215mm (300 x 300 DPI)

For peer review only



1  
2  
3  
4  
5  
6  
7  
8  
9  
10  
11  
12  
13  
14  
15  
16  
17  
18  
19  
20  
21  
22  
23  
24  
25  
26  
27  
28  
29  
30  
31  
32  
33  
34  
35  
36  
37  
38  
39  
40  
41  
42  
43  
44  
45  
46  
47  
48  
49  
50  
51  
52  
53  
54  
55  
56  
57  
58  
59  
60

Figure 2: Website Design Elements

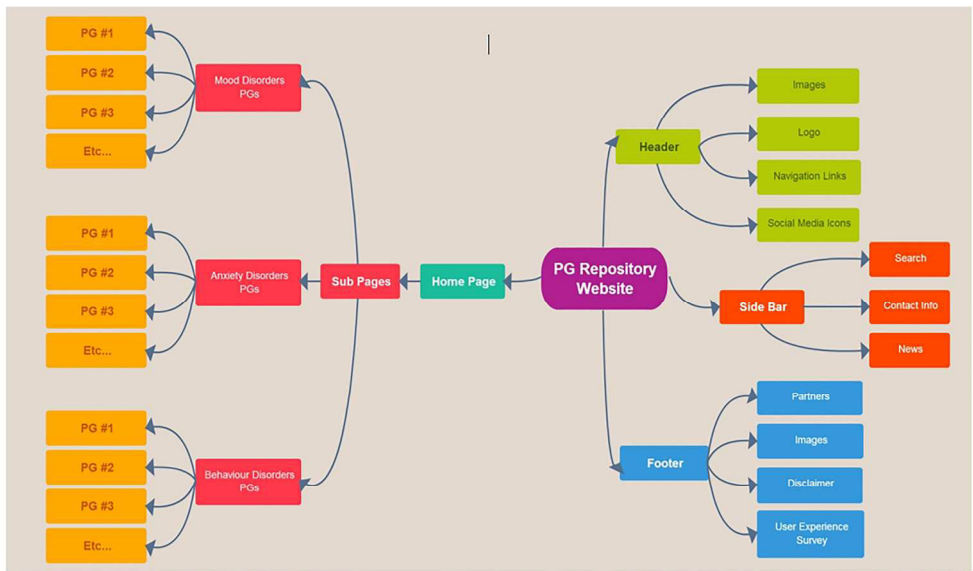

279x180mm (299 x 299 DPI)

view only

## Supplement 1: Detailed Search Strategy for Depression and Anxiety PGs

### Medline-OVID

July 23, 2015

1. exp clinical pathway/
2. exp clinical protocol/
3. exp consensus/
4. exp consensus development conference/
5. exp consensus development conferences as topic/
6. critical pathways/
7. exp guideline/
8. guidelines as topic/
9. exp practice guideline/
10. practice guidelines as topic/
11. health planning guidelines/
12. treatment guidelines.mp.
13. (guideline or practice guideline or consensus development conference or consensus development conference, NIH).pt.
14. (position statement\* or policy statement\* or practice parameter\* or best practice\*).ti,ab.
15. (standards or guideline or guidelines).ti.
16. ((practice or treatment\*) adj guideline\*).ab.
17. (CPG or CPGs).ti.
18. Consensus\*.ti.
19. consensus\*.ab. /freq=2
20. ((critical or clinical or practice) adj2 (path or paths or pathway or pathways or protocol\*)),ti,ab.
21. recommendat\*.ti.
22. (care adj2 (standard or path or paths or pathway or pathways or map or maps or plan or plans)).ti,ab.
23. (algorithm\* adj2 (screening or examination or test or tested or testing or assessment\* or diagnosis or diagnoses or diagnosed or diagnosing)).ti,ab.
24. (algorithm\* adj2 (pharmacotherap\* or chemotherap\* or chemotreatment\* or therap\* or treatment\* or intervention\*)).ti,ab.
25. or/1-24
26. mental disorders/ or anxiety disorders/ or agoraphobia/ or panic disorder/ or phobic disorders/
27. affective disorders, psychotic/ or bipolar disorder/ or depressive disorder/ or depressive disorder, major/ or dysthymic disorder/
28. mental disorders/ or anxiety, separation/ or "attention deficit and disruptive behavior disorders"/ or attention deficit disorder with hyperactivity/ or conduct disorder/
29. oppositional defiant disorder.mp.
30. Mental health/
31. (mental health or emotional health or depression or anxiety or bipolar or dysthymia or agoraphobia or phobia or phobic or panic disorder or conduct disorder or disruptive behavio?r disorder\* or attention deficit).kw,ti.

32. 26 or 27 or 28 or 29 or 30 or 31
33. (pediatric\* or paediatric\* or child\* or adolescent? or youth? or teenager? or teen?).ti,jn.
34. 25 and 32
35. 33 and 34
36. limit 34 to ("all child (0 to 18 years)" or "preschool child (2 to 5 years)" or "child (6 to 12 years)" or "adolescent (13 to 18 years)")
37. 35 or 36
38. limit 37 to english language
39. limit 38 to yr="2005 - 2015"

### EMBASE-OVID

July 23 2015

1. exp clinical pathway/
2. exp clinical protocol/
3. exp consensus/
4. exp consensus development conference/
5. exp consensus development conferences as topic/
6. critical pathways/
7. exp guideline/
8. guidelines as topic/
9. exp practice guideline/
10. practice guidelines as topic/
11. health planning guidelines/
12. treatment guidelines.mp.
13. (guideline or practice guideline or consensus development conference or consensus development conference, NIH).pt.
14. (position statement\* or policy statement\* or practice parameter\* or best practice\*).ti,ab.
15. (standards or guideline or guidelines).ti.
16. ((practice or treatment\*) adj guideline\*).ab.
17. (CPG or CPGs).ti.
18. Consensus\*.ti.
19. consensus\*.ab. /freq=2
20. ((critical or clinical or practice) adj2 (path or paths or pathway or pathways or protocol)).ti,ab.
21. recommendat\*.ti.
22. (care adj2 (standard or path or paths or pathway or pathways or map or maps or plan or plans)).ti,ab.
23. (algorithm\* adj2 (screening or examination or test or tested or testing or assessment\* or diagnosis or diagnoses or diagnosed or diagnosing)).ti,ab.
24. (algorithm\* adj2 (pharmacotherap\* or chemotherap\* or chemotreatment\* or therap\* or treatment\* or intervention\*)).ti,ab.
25. or/1-24
26. exp behavior disorder/ or mental disease/
27. exp anxiety disorder/

28. exp mood disorder/
29. exp mental health/
30. oppositional defiant disorder.mp.
31. (mental health or emotional health or depression or anxiety or bipolar or dysthymia or agoraphobia or phobia or phobic or panic disorder or conduct disorder or disruptive behavior disorder\* or attention deficit).kw,ti.
32. or/26-31
33. 25 and 32
34. limit 33 to (child or preschool child <1 to 6 years> or school child <7 to 12 years> or adolescent <13 to 17 years>)
35. (pediatric\* or paediatric\* or child\* or adolescent? or youth? or teenager? or teen?).ti,jn.
36. 33 and 35
37. 34 or 36
38. limit 37 to english language
39. limit 38 to yr="2005 - 2015"

### PsycINFO-OVID

July 23 2015

1. exp clinical pathway/
2. exp clinical protocol/
3. exp consensus/
4. exp consensus development conference/
5. exp consensus development conferences as topic/
6. critical pathways/
7. exp guideline/
8. guidelines as topic/
9. exp practice guideline/
10. practice guidelines as topic/
11. health planning guidelines/
12. treatment guidelines.mp.
13. (guideline or practice guideline or consensus development conference or consensus development conference, NIH).pt.
14. (position statement\* or policy statement\* or practice parameter\* or best practice\*).ti,ab.
15. (standards or guideline or guidelines).ti.
16. ((practice or treatment\*) adj guideline\*).ab.
17. (CPG or CPGs).ti.
18. Consensus\*.ti.
19. consensus\*.ab. /freq=2
20. ((critical or clinical or practice) adj2 (path or paths or pathway or pathways or protocol)).ti,ab.
21. recommendat\*.ti.
22. (care adj2 (standard or path or paths or pathway or pathways or map or maps or plan or plans)).ti,ab.

- 1  
2  
3 23. (algorithm\* adj2 (screening or examination or test or tested or testing or assessment\*  
4 or diagnosis or diagnoses or diagnosed or diagnosing)).ti,ab.  
5 24. (algorithm\* adj2 (pharmacotherap\* or chemotherap\* or chemotreatment\* or therap\*  
6 or treatment\* or intervention\*)).ti,ab.  
7 25. or/1-24  
8 26. oppositional defiant disorder.mp.  
9 27. (mental health or emotional health or depression or anxiety or bipolar or dysthymia or  
10 agoraphobia or phobia or phobic or panic disorder or conduct disorder or disruptive  
11 behavio?r disorder\* or attention deficit).kw,ti.  
12 28. mental disorders/ or exp anxiety disorders/ or exp impulse control disorders/ or exp  
13 behavior disorders/ or conduct disorder/  
14 29. exp affective disorders/  
15 30. oppositional defiant disorder/  
16 31. or/26-30  
17 32. 25 and 31  
18 33. (pediatric\* or paediatric\* or child\* or adolescent? or youth? or teenager? or  
19 teen?).ti,jn.  
20 34. 32 and 33  
21 35. limit 32 to (childhood or adolescence <13 to 17 years>)  
22 36. 34 or 35  
23 37. limit 36 to english language  
24 38. limit 37 to yr="2005 - 2015"

**CINAHL -EBSCO**

July 23 2015

| Search ID# | Search Terms                                                                                                                      | Search Options                                                                                                                                       |
|------------|-----------------------------------------------------------------------------------------------------------------------------------|------------------------------------------------------------------------------------------------------------------------------------------------------|
| S24        | S23                                                                                                                               | Limiters - Published Date: 20050101-20151231;<br>Language: English<br>Search modes - Boolean/Phrase                                                  |
| S23        | S22                                                                                                                               | Limiters - Age Groups: Infant: 1-23 months, Child, Preschool: 2-5 years, Child: 6-12 years, Adolescent: 13-18 years<br>Search modes - Boolean/Phrase |
| S22        | S14 AND S21                                                                                                                       | Search modes - Boolean/Phrase                                                                                                                        |
| S21        | S15 OR S16 OR S17 OR S18 OR S19 OR S20                                                                                            | Search modes - Boolean/Phrase                                                                                                                        |
| S20        | TI mental health or emotional health or depression or anxiety or bipolar or dysthymia or agoraphobia or phobia or phobic or panic | Search modes - Boolean/Phrase                                                                                                                        |

|     |                                                                                                                                                                                                                        |                               |
|-----|------------------------------------------------------------------------------------------------------------------------------------------------------------------------------------------------------------------------|-------------------------------|
|     | disorder or conduct disorder or disruptive behavior?r disorder* or attention deficit                                                                                                                                   |                               |
| S19 | SU mental health or emotional health or depression or anxiety or bipolar or dysthymia or agoraphobia or phobia or phobic or panic disorder or conduct disorder or disruptive behavior?r disorder* or attention deficit | Search modes - Boolean/Phrase |
| S18 | "oppositional defiant disorder"                                                                                                                                                                                        | Search modes - Boolean/Phrase |
| S17 | "conduct disorder"                                                                                                                                                                                                     | Search modes - Boolean/Phrase |
| S16 | (MH "Anxiety Disorders+")                                                                                                                                                                                              | Search modes - Boolean/Phrase |
| S15 | (MH "Mental Disorders") OR (MH "Neurotic Disorders+") OR (MH "Mental Disorders Diagnosed in Childhood+")                                                                                                               | Search modes - Boolean/Phrase |
| S14 | S1 OR S2 OR S3 OR S4 OR S5 OR S6 OR S7 OR S8 OR S9 OR S10 OR S11 OR S12 OR S13                                                                                                                                         | Search modes - Boolean/Phrase |
| S13 | TX (algorithm* N2 (pharmacotherap* or chemotherap* or chemotreatment* or therap* or treatment* or intervention*))                                                                                                      | Search modes - Boolean/Phrase |
| S12 | TX (algorithm* N2 (screening or examination or test or tested or testing or assessment* or diagnosis or diagnoses or diagnosed or diagnosing))                                                                         | Search modes - Boolean/Phrase |
| S11 | TX (care N2 (standard or path or paths or pathway or pathways or map or maps or plan or plans))                                                                                                                        | Search modes - Boolean/Phrase |
| S10 | TI recommendat*                                                                                                                                                                                                        | Search modes - Boolean/Phrase |
| S9  | TX ((critical or clinical or practice) N2 (path or paths or pathway or pathways or protocol*))                                                                                                                         | Search modes - Boolean/Phrase |
| S8  | TI Consensus*                                                                                                                                                                                                          | Search modes - Boolean/Phrase |
| S7  | TI CPG or CPGs                                                                                                                                                                                                         | Search modes - Boolean/Phrase |
| S6  | AB ((practice or treatment*) N2 guideline*).                                                                                                                                                                           | Search modes - Boolean/Phrase |
| S5  | TI standards or guideline or guidelines                                                                                                                                                                                | Search modes - Boolean/Phrase |
| S4  | TX position statement* or policy statement* or practice parameter* or best practice                                                                                                                                    | Search modes - Boolean/Phrase |

|    |                            |                                  |
|----|----------------------------|----------------------------------|
| S3 | PT practice guidelines     | Search modes -<br>Boolean/Phrase |
| S2 | (MH "Critical Path")       | Search modes -<br>Boolean/Phrase |
| S1 | (MH "Practice Guidelines") | Search modes -<br>Boolean/Phrase |

## Grey Literature Search Terms

### *Guideline Specific Sites*

mental health OR emotional health OR depression OR anxiety OR bipolar OR dysthymia OR agoraphobia OR phobia OR phobic OR panic disorder OR conduct disorder OR disruptive behavior disorder\* OR disruptive behaviour disorder\* OR attention deficit OR oppositional defiant disorder OR mental disorder\* OR emotional disorder\* OR affective disorder\* AND pediatric\* or paediatric\* or child\* or adolescent\* or youth\* or teenager\* or teen\*

### *Other Grey Literature*

mental health OR emotional health OR depression OR anxiety OR bipolar OR dysthymia OR agoraphobia OR phobia OR phobic OR panic disorder OR conduct disorder OR disruptive behavior disorder\* OR disruptive behaviour disorder\* OR attention deficit OR oppositional defiant disorder OR mental disorder\* OR emotional disorder\* OR affective disorder\* AND pediatric\* or paediatric\* or child\* or adolescent\* or youth\* or teenager\* or teen\* AND guideline\* OR CPG\* OR care pathway\* OR consensus statement\* OR best practice OR practice parameter\* OR position statement OR policy statement OR protocol\* OR expert committee

### *Grey Literature Search Sites*

National Guidelines Clearinghouse <http://www.guideline.gov/>  
 Scottish Intercollegiate Guidelines Network (SIGN) <http://www.sign.ac.uk/>  
 Clinical Practice Guidelines Portal (Australia) <https://www.clinicalguidelines.gov.au/>  
 Guidelines International Network <http://www.g-i-n.net/>  
 Canadian Academy of Child and Adolescent Psychiatry (CACAP) [http://www.cacap-acpea.org/en/cacap/Policies\\_amp\\_Guidelines\\_p810.html](http://www.cacap-acpea.org/en/cacap/Policies_amp_Guidelines_p810.html)  
 Canadian Paediatric Society <http://www.cps.ca/en/>  
 The College of Family Physicians of Canada <http://www.cfpc.ca/ForHealthProfessionals/>  
 BC Mental Health & Substance Use Services <http://www.bcmhsus.ca/resources/guidelines-and-protocols>  
 Canadian ADHD Resource Alliance (CADDRA) [http://www.caddra.ca/cms4/index.php?option=com\\_content&view=article&id=26&Itemid=70&lang=en](http://www.caddra.ca/cms4/index.php?option=com_content&view=article&id=26&Itemid=70&lang=en)  
 BCGuidelines.ca <http://www2.gov.bc.ca/gov/content/health/practitioner-professional-resources/bc-guidelines>  
 American Academy of Child and Adolescent Psychiatry (AACAP) <http://www.aacap.org/>  
 YoungMinds <http://www.youngminds.org.uk/search?q=guidelines>



1  
2  
3 Royal College of Paediatrics and Child Health (RCPCH)  
4 [http://www.rcpch.ac.uk/improving-child-health/clinical-guidelines-and-](http://www.rcpch.ac.uk/improving-child-health/clinical-guidelines-and-standards/endorsed-and-supported/child-mental-health)  
5 [standards/endorsed-and-supported/child-mental-health](http://www.rcpch.ac.uk/improving-child-health/clinical-guidelines-and-standards/endorsed-and-supported/child-mental-health)  
6  
7 Ministry of Health Malaysia <http://www.moh.gov.my/index.php/pages/view/149>  
8 Canadian Mental Health Association (CMHA) <http://www.cmha.ca/>  
9 National Institute for Health Care Excellence (NICE) <https://www.nice.org.uk/guidance>  
10 Canadian Medical Association Infobase [https://www.cma.ca/En/Pages/clinical-practice-](https://www.cma.ca/En/Pages/clinical-practice-guidelines.aspx)  
11 [guidelines.aspx](https://www.cma.ca/En/Pages/clinical-practice-guidelines.aspx)  
12 Centre for Addiction and Mental Health (CAMH)  
13 <http://www.camh.ca/en/hospital/Pages/home.aspx>  
14 Mental Health Commission of Canada <http://www.mentalhealthcommission.ca/English/>  
15 Canadian Psychological Association <http://www.cpa.ca/>  
16  
17

18 In addition, a search, using the same terms, was u  
19  
20  
21  
22  
23  
24  
25  
26  
27  
28  
29  
30  
31  
32  
33  
34  
35  
36  
37  
38  
39  
40  
41  
42  
43  
44  
45  
46  
47  
48  
49  
50  
51  
52  
53  
54  
55  
56  
57  
58  
59  
60

**PRISMA-P (Preferred Reporting Items for Systematic review and Meta-Analysis Protocols) 2015 checklist: recommended items to address in a systematic review protocol\***

| Section and topic                 | Item No | Page# | Checklist item                                                                                                                                                                                                                |
|-----------------------------------|---------|-------|-------------------------------------------------------------------------------------------------------------------------------------------------------------------------------------------------------------------------------|
| <b>ADMINISTRATIVE INFORMATION</b> |         |       |                                                                                                                                                                                                                               |
| Title:                            |         |       | Towards High Quality, Useful Practice Guidelines for Child and Youth Mental Health Disorders: Protocol for a Systematic Review and Consensus Exercise.                                                                        |
| Identification                    | 1a      | 1     | Identify the report as a protocol of a systematic review                                                                                                                                                                      |
| Update                            | 1b      | N/A   | If the protocol is for an update of a previous systematic review, identify as such                                                                                                                                            |
| Registration                      | 2       | 3     | If registered, provide the name of the registry (such as PROSPERO) and registration number                                                                                                                                    |
| Authors:                          |         |       |                                                                                                                                                                                                                               |
| Contact                           | 3a      | 1     | Provide name, institutional affiliation, e-mail address of all protocol authors; provide physical mailing address of corresponding author                                                                                     |
| Contributions                     | 3b      | 2     | Describe contributions of protocol authors and identify the guarantor of the review                                                                                                                                           |
| Amendments                        | 4       | N/A   | If the protocol represents an amendment of a previously completed or published protocol, identify as such and list changes; otherwise, state plan for documenting important protocol amendments                               |
| Support:                          |         |       |                                                                                                                                                                                                                               |
| Sources                           | 5a      | 2     | Indicate sources of financial or other support for the review                                                                                                                                                                 |
| Sponsor                           | 5b      | N/A   | Provide name for the review funder and/or sponsor                                                                                                                                                                             |
| Role of sponsor or funder         | 5c      | 2     | Describe roles of funder(s), sponsor(s), and/or institution(s), if any, in developing the protocol                                                                                                                            |
| <b>INTRODUCTION</b>               |         |       |                                                                                                                                                                                                                               |
| Rationale                         | 6       | 4     | Describe the rationale for the review in the context of what is already known                                                                                                                                                 |
| Objectives                        | 7       | 4     | Provide an explicit statement of the question(s) the review will address with reference to participants, interventions, comparators, and outcomes (PICO)                                                                      |
| <b>METHODS</b>                    |         |       |                                                                                                                                                                                                                               |
| Eligibility criteria              | 8       | 5     | Specify the study characteristics (such as PICO, study design, setting, time frame) and report characteristics (such as years considered, language, publication status) to be used as criteria for eligibility for the review |
| Information sources               | 9       | 5     | Describe all intended information sources (such as electronic databases, contact with study authors, trial registers or other grey literature sources) with planned dates of coverage                                         |
| Search strategy                   | 10      | 5     | Present draft of search strategy to be used for at least one electronic database, including planned limits, such that it could be repeated                                                                                    |

|                                    |     |     |                                                                                                                                                                                                                                                  |
|------------------------------------|-----|-----|--------------------------------------------------------------------------------------------------------------------------------------------------------------------------------------------------------------------------------------------------|
| Study records:                     |     |     |                                                                                                                                                                                                                                                  |
| Data management                    | 11a | 5   | Describe the mechanism(s) that will be used to manage records and data throughout the review                                                                                                                                                     |
| Selection process                  | 11b | 5   | State the process that will be used for selecting studies (such as two independent reviewers) through each phase of the review (that is, screening, eligibility and inclusion in meta-analysis)                                                  |
| Data collection process            | 11c | 6   | Describe planned method of extracting data from reports (such as piloting forms, done independently, in duplicate), any processes for obtaining and confirming data from investigators                                                           |
| Data items                         | 12  | 6   | List and define all variables for which data will be sought (such as PICO items, funding sources), any pre-planned data assumptions and simplifications                                                                                          |
| Outcomes and prioritization        | 13  | 6   | List and define all outcomes for which data will be sought, including prioritization of main and additional outcomes, with rationale                                                                                                             |
| Risk of bias in individual studies | 14  | 6   | Describe anticipated methods for assessing risk of bias of individual studies, including whether this will be done at the outcome or study level, or both; state how this information will be used in data synthesis                             |
| Data synthesis                     | 15a | 6   | Describe criteria under which study data will be quantitatively synthesised                                                                                                                                                                      |
|                                    | 15b | 6   | If data are appropriate for quantitative synthesis, describe planned summary measures, methods of handling data and methods of combining data from studies, including any planned exploration of consistency (such as $I^2$ , Kendall's $\tau$ ) |
|                                    | 15c | N/A | Describe any proposed additional analyses (such as sensitivity or subgroup analyses, meta-regression)                                                                                                                                            |
|                                    | 15d | N/A | If quantitative synthesis is not appropriate, describe the type of summary planned                                                                                                                                                               |
| Meta-bias(es)                      | 16  | N/A | Specify any planned assessment of meta-bias(es) (such as publication bias across studies, selective reporting within studies)                                                                                                                    |
| Confidence in cumulative evidence  | 17  | N/A | Describe how the strength of the body of evidence will be assessed (such as GRADE)                                                                                                                                                               |

**\* It is strongly recommended that this checklist be read in conjunction with the PRISMA-P Explanation and Elaboration (cite when available) for important clarification on the items. Amendments to a review protocol should be tracked and dated. The copyright for PRISMA-P (including checklist) is held by the PRISMA-P Group and is distributed under a Creative Commons Attribution Licence 4.0.**

*From: Shamseer L, Moher D, Clarke M, Ghersi D, Liberati A, Petticrew M, Shekelle P, Stewart L, PRISMA-P Group. Preferred reporting items for systematic review and meta-analysis protocols (PRISMA-P) 2015: elaboration and explanation. BMJ. 2015 Jan 2;349(jan02 1):g7647.*
